# Supplementary material
Source: PubMed Central journal article supplement (PMC5918466)
Supplement: NIHMS902905-supplement-supplement_1.pdf [file NIHMS902905-supplement-supplement_1.pdf]

908 **Supplementary Materials**

909

910 **MyD88-dependent Dendritic and Epithelial Cell Crosstalk in the**  
911 **Lung Orchestrates Immune Responses to Inhaled Allergens**

912

913 Seddon Y. Thomas, Gregory S. Whitehead, Motoki Takaku, James M. Ward,  
914 Xiaojiang Xu, Keiko Nakano, Miranda R. Lyons-Cohen, Hideki Nakano, Kimberly  
915 M. Gowdy, Paul A. Wade and Donald N. Cook

## 916 **Supplementary Materials and Methods**

### 917 **Nanostring Mouse Immunology Gene Expression**

918 Gene expression data for whole lung RNA were normalized using 14 Nanostring nSolver  
919 housekeeper genes: *Alas1*, *Eef1g*, *G6pdx*, *Gapdh*, *Gusb*, *Hprt*, *Oaz1*, *Polr1b*, *Polr2a*, *Ppia*,  
920 *Rpl19*, *Sdha*, *Tbp*, and *Tubb5*. Sorted EC, cDC, and AM samples were quantile normalized using  
921 raw Nanostring counts. Between Groups Analysis (BGA) of the data was carried out using the  
922 Bioconductor made4 package (version 1.45.0), using log<sub>2</sub>-transformed normalized expression  
923 values. Genes having a group mean intensity  $\geq 32$  (ie. log<sub>2</sub>  $\geq 5$ ) for at least one sample group were  
924 considered to be expressed. All other genes were considered to be below the minimum intensity  
925 threshold (MTI). Data analysis was performed in R version 3.2.1, using limma (version 3.27.5)  
926 from Bioconductor (version 2.31.0) for statistical linear modeling, using a moderated t-test. For  
927 each pairwise comparison, hits were defined using  $p \leq 0.01$ , fold change  $\geq 1.5$ .

928

929 Minimum threshold intensity (MTI) was determined using the positive and negative control probes  
930 provided by Nanostring. We selected a constant MTI using normalized group mean  $\geq 32$  for  
931 consistency across the datasets. Nanostring outliers were identified on the basis of an aberrant  
932 MA plot using raw data, e.g. extremely high variability compared with other samples in the study,  
933 and sample correlation which differed more than 5x median absolute deviation (MAD) from other  
934 replicates in the sample group.

935

### 936 **Primary data processing for ATAC-seq**

937 Data were collected using 50 bp paired-end reads from NextSeq platform (Illumina). Raw reads  
938 were first cleaned for adapter sequences using Trim Galore with default parameters. Cleaned  
939 reads were aligned to mm9 using Bowtie with the parameters -m1, -v2 and -X1500. These  
940 parameters ensured that fragments up to 1500bp (-X1500) and mismatch up to 2 (-v2) were  
941 allowed to align, and that only unique aligning reads were collected (-m1) and mapped to the  
942 mm9 genome. For all data files, duplicates were removed using Picard. The total number of such  
943 reads per sample ranged from 19,955,634 to 85,555,024 with an average of ~40,000,000 reads,

944 of which 75.93% to 78.66% mapped to unique sites.

945

946 Two biology replicates for each condition were merged into one sample. Comparison of the  
947 biological replicates for each genotype and condition revealed that they were between 88.4% and  
948 98.9% identical. Given this high degree of similarity, we pooled replicates to give between  
949 62,978,130 and 122,040,288 reads per condition and used the combined files for peak calling.  
950 For peak calling, we adjusted the read start sites to represent the center of the transposon  
951 binding site. Previous descriptions of the Tn5 transposase show that the transposon binds as a  
952 dimer and inserts two adaptors separated by 9 bp.<sup>51</sup> Therefore, all reads aligning to the + strand  
953 were offset by +4 bp, and all reads aligning to the – strand were offset –5 bp.

954

#### 955 **ATAC-seq peak-calling**

956 We used *PeaKDEck*<sup>52</sup> (Version 1.1) to call all reported ATAC-seq peaks. *PeaKDEck*  
957 distinguishes signal from noise by randomly sampling read densities and using kernel density  
958 estimation to generate a dataset-specific probability distribution of random background signal.  
959 *PeaKDEck* then uses this probability distribution to select an appropriate read density threshold  
960 for 300 bp and probability value <0.0001.

961

#### 962 **ATAC-seq differential peak identification**

963 After peak calling for each sample, we obtained the union of peaks called from all paired  
964 conditions as the candidate regions for quantitative comparison. For each comparison, union  
965 peak lists were made by two steps: 1) Two lists of peaks were put into one file and sorted; 2)  
966 Overlapping and neighboring peaks within 100nt were merged using *mergeBed* from *bedTools*  
967 (version 2.16.2). Read counts of each union peak for each sample were calculated using  
968 *intersectBed* from *bedTools*. R (R-program project) was used to build a statistical model to detect  
969 significant peaks.

970

971 The “Z-test” method from EpiCenter<sup>53</sup> was applied as a statistical test to find genomic regions  
 972 whose ratio (fold-change) and difference (Delta) between samples was extreme compared to the  
 973 expected distribution of z-scores across the genome. Based on our observations and testing from  
 974 real data, we found that log2 ratios of normalized read counts are sensitive to narrow peaks, and  
 975 differences (Delta) are sensitive to broad peaks. We therefore modified the score calculation by  
 976 combining both Ratios and Delta. The first, normalized count ( $C_{nk}$ , n is n<sup>th</sup> peak and k is k<sup>th</sup>  
 977 samples) of peaks was calculated as Reads Per 10 Kilobase of peak per Million mapped reads. A  
 978 score was calculated as follows:

$$\widehat{S}_n = \log_2 \frac{C_{n1}}{C_{n2}} * \log_2 |C_{n1} - C_{n2}|$$

979 A z-test was constructed by assuming a Gaussian distribution, and a p-value was computed for  
 980 each peak. Regions with  $p \leq 0.05$  were considered significant. This procedure was repeatedly  
 981 applied to all paired comparisons. Of the 124,144 to 164,963 union peaks generated for each  
 982 paired condition, 42,238 to 69,796 significant differential peaks were identified. All significant  
 983 peaks were assigned to individual genes using PAVIS.<sup>54</sup>

984

#### 985 **Association of Differential ATAC-seq peaks with Defined Promoter Loci**

986 To narrow the list of differential promoter-associated peaks, we restricted our analysis to peaks  
 987 within  $\pm 500$  bp of the TSS as well as a 1.3-fold change,  $p \leq 0.05$ , and peak read depth  $\geq 100$   
 988 counts for at least one sample group.

989

#### 990 **Whole Transcriptome Microarray Amplification, Hybridization and Probe Level Analysis**

991 Thirty-five ng total RNA from sorted cDCs was amplified using the WT-Ovation Pico RNA  
 992 Amplification System protocol (Nugen, San Carlos, CA). Sense strand cDNA target was made  
 993 using the Nugen Exon Module, and after fragmentation the product was labeled with the Nugen  
 994 Encore Biotin module. Five  $\mu\text{g}$  of resulting amplified biotin-cDNAs were hybridized to the  
 995 Affymetrix Mouse Whole Transcriptome Array 1.0 according to manufacturer’s instructions and  
 996 scanned in an Affymetrix Scanner 3000 (Affymetrix, Santa Clara, CA). Data was obtained using  
 997 the GeneChip® Command Console software. Analyses of probe level and gene level data was

998 performed using the Affymetrix Expression Console (EC) and Transcriptome Analysis Console  
 999 (TAC) software. p-values were generated using the Affymetrix Transcriptome Analysis Console  
 1000 (TAC) software version 3.0 using a one-way between subject ANOVA (unpaired).

1001

### 1002 **Analysis of Transcriptional Regulation associated with Open Chromatin**

1003 Regions of the genome associated with differential, promoter-associated ATAC-seq peaks were  
 1004 matched with local transcripts from the Ensembl database. In some cases, such as bidirectional  
 1005 transcription, more than one gene was associated with an individual ATAC-seq peak, and were  
 1006 analyzed separately. Transcripts were excluded from analysis if their start sites were not within  
 1007 500 bp of the ATAC-seq peak. Using the Affymetrix Transcriptome Analysis Console, 5' and 3'  
 1008 probes were defined for all loci examined, and only genes with at least 2 different probes were  
 1009 included in further analysis. The 3' probe selected excluded the 3' UTR to minimize any post-  
 1010 transcriptional alterations in RNA stability.

1011

1012 Mean values reflecting signals for all probes on the transcriptome array were calculated for each  
 1013 gene whose chromatin accessibility after allergic sensitization differed between lung cDCs of WT  
 1014 mice and those of the conditionally mutant *Myd88* mice. Genes were placed in categories based  
 1015 on the following criteria.

1016 **A) Expressed.** Genes whose maximum mean bi-weight log<sub>2</sub> probe signal of at least one group  
 1017 was  $\geq 6.0$ . This value was used for the minimum threshold intensity (MTI).

1018 **B) No differential expression.** Genes whose expression between genotypes is different by less  
 1019 than 1.5-fold.

1020 **C) Baseline different; not induced.** Genes whose expression between genotypes at baseline  
 1021 (0h) is greater than 1.5-fold, but this difference does not further increase by more than 1.5 fold  
 1022 after allergic sensitization (6h). ie.  $\frac{WT6h/Mut6h}{WT0h/Mut0h} \leq 1.5$

1023 **D) Induced.** Genes that are more highly expressed (1.5-fold) after allergic sensitization (6h post-  
 1024 OVA/FLA) than at baseline (0h), and where that difference is dependent on MyD88. Genes

1025 expressed above the MTI were considered to be induced when following two ratios of mean  
1026 probe signal strength were greater than 1.5.

1027 •  $\frac{WT6h}{WT0h}$ , where *6h* and *0h* refer to post-sensitization and steady state, respectively.

1028 •  $\frac{WT6h}{Mut6h}$ , where *Mut* refers to the conditional *Myd88* mutant under study.

1029

1030 **D1) Induced through transcription initiation.** Genes whose MyD88-dependent increase in  
1031 mRNA level can be measured with a 5' probe; ie. genes expressed above the MTI and for which  
1032 the following ratio was  $\geq 1.5$ .

1033 •  $\frac{5'WT6h}{5'Mut6h}$ , where *5'* refers to the probe closest to the 5' end of the transcript.

1034

1035 **D2) Induced through RNA Elongation.** Genes whose MyD88-dependent increase in mRNA  
1036 level is greater when measured with a 3' probe than with a 5' probe; ie. genes expressed above  
1037 the MTI and for which each the following four ratios were  $\geq 1.5$ .

1038 •  $\frac{3'WT6h}{3'WT0h}$ , indicating higher gene expression in WT cDCs after allergic sensitization than at  
1039 steady state, as measured with a 3' probe.

1040 •  $\frac{3'WT6h}{3'Mut6h}$ , indicating *Myd88*-dependent gene expression, as measured with a 3' probe.

1041 •  $\frac{3'WT6h/3'Mut6h}{3'WT0h/3'Mut0h} = (3' \text{ ratio})$ , indicating a greater effect of *Myd88* on gene expression after

1042 allergic sensitization than at steady state, as measured with a 3' probe.

1043 •  $\frac{3'ratio}{5'ratio}$ , indicating the *Myd88*-dependent increase in expression after sensitization is

1044 greater when measured using 3' probes than with 5' probes: ( $5' \text{ ratio} = \frac{5'WT6h/5'Mut6h}{5'WT0h/5'Mut0h}$ ).

1045

1046 **D3) Induced (complex).** Expressed genes induced in a MYD88-dependent manner, but not  
1047 fitting the criteria of categories **D1)** or **D2)**.

1048

**1049 Whole Transcriptome Microarray Differential Gene Expression Analysis**

1050 Whole transcriptome array genes were filtered based on a bi-weight log<sub>2</sub> average probe signal  $\geq 7$   
1051 and a ratio of  $\geq 2$  for at least one genotype and treated WT mice (reference group). DC-MyD88-  
1052 dependent genes were defined as those having a ratio of  $\geq 2$  for both DC-KO/WT and KO/WT,  
1053 and a ratio of  $< 2$  for EC-KO/WT. EC-MyD88-dependent genes had a ratio of  $\geq 2$  for both EC-  
1054 KO/WT and KO/WT, and  $< 2$  for DC-KO/WT. Genes were ranked according to absolute fold  
1055 change in DC-KO/WT or EC-KO/WT genes, respectively. Heat maps were generated using the  
1056 Partek Genomic Suite software (Partek, St Louis, MO).

1057

**1058 Pathway analysis**

1059 For pathway analysis of whole transcriptome microarray data, gene hits were defined as those  
1060 with a bi-weight log<sub>2</sub> average signal  $\geq 7$ ,  $p \leq 0.05$ , and  $\geq 1.3$  fold change as compared to WT  
1061 (reference group) or bi-weight log<sub>2</sub> average signal  $\geq 7$ , no p-value restriction, and  $\geq 2$  fold change  
1062 as compared to WT.

1063

1064 Pathway analysis was performed using the Ingenuity Pathway Analysis software to calculate the  
1065 p-value of likely pathway association (Ingenuity, Redwood City, CA). The most differential  
1066 pathways for DC-KO and EC-KO cDCs were ranked using a ratio of  $-\log(p\text{-value})$  of DC-KO/WT  
1067 vs EC-KO/WT. In cases where the p-value was equal to zero (since no genes in the pathway  
1068 were altered), the  $-\log(p\text{-value})$  for that subset was defined as 0.2 (or  $p=0.63$ ) to allow ranking by  
1069  $-\log(p\text{-value})$  ratio. Heat maps were generated using the Partek Genomic Suite software (Partek,  
1070 St Louis, MO).

1071 **Supplementary References**

- 1072 51. Adey, A. *et al.* Rapid, low-input, low-bias construction of shotgun fragment libraries by  
1073 high-density in vitro transposition. *Genome biology* **11**, R119 (2010).  
1074
- 1075 52. McCarthy, M.T. & O'Callaghan, C.A. PeaKDEck: a kernel density estimator-based peak  
1076 calling program for DNaseI-seq data. *Bioinformatics* **30**, 1302-1304 (2014).  
1077
- 1078 53. Huang, W. *et al.* Efficiently identifying genome-wide changes with next-generation  
1079 sequencing data. *Nucleic acids research* **39**, e130 (2011).  
1080
- 1081 54. Huang, W., Loganantharaj, R., Schroeder, B., Fargo, D. & Li, L. PAVIS: a tool for Peak  
1082 Annotation and Visualization. *Bioinformatics* **29**, 3097-3099 (2013).  
1083  
1084



1085 **Supplementary Figure and Table Legends.**

1086 **Supplementary Figure 1. *Cd11c-cre*-mediated recombination in CD103<sup>+</sup> DCs, CD11b<sup>+</sup> DCs**  
1087 **and AMs or *Sftpc-cre*-mediated recombination in ECs.** (a) Flow cytometry gating strategy for  
1088 lung CD11b<sup>+</sup> DCs, CD103<sup>+</sup> DCs, and AMs from *Cd11c-cre*<sup>+</sup> x ROSA-loxP-STOP-loxP *tdTomato*  
1089 (RT) mice. Lung DCs were first gated on single cells that are CD11c<sup>hi</sup>, nonautofluorescent, and I-  
1090 A<sup>b+</sup>, then divided into CD11b<sup>+</sup> or CD103<sup>+</sup> DCs. AMs were gated on CD11c<sup>hi</sup> autofluorescent<sup>hi</sup>  
1091 cells. (b) Quantitation of *tdTomato* expression in the indicated cell types. Data are representative  
1092 of cells from three *Cd11c-cre* x RT mice. (c) Flow cytometry gating strategy for EpCAM<sup>+</sup> ECs  
1093 prepared from *Sftpc-cre*<sup>+</sup> x ROSA-loxP-STOP-loxP *tdTomato* (RT) mice. ECs were gated on  
1094 single, live (7AAD<sup>-</sup>), lineage<sup>-</sup> (CD31<sup>-</sup> CD34<sup>-</sup> CD45<sup>-</sup>) EpCAM<sup>+</sup> cells. Lineage<sup>+</sup> EpCAM<sup>-</sup> cells (non-  
1095 epithelial cells) express little *tdTomato*, whereas almost all lineage<sup>-</sup> EpCAM<sup>+</sup> cells (ECs) are  
1096 *tdTomato*<sup>+</sup>. (d) Quantitation of *tdTomato* expression in Lin<sup>+</sup> EpCAM<sup>-</sup> and Lin<sup>-</sup>EpCAM<sup>+</sup> cells. Data  
1097 shown is representative of lung cells from three *Sftpc-cre* x RT mice.

1098

1099 **Supplementary Figure 2. IL33 adjuvant activity is independent of MyD88 in ECs or *Cd11c*-**  
1100 **expressing cells and *Ii1a* is expressed in AMs in a *Cd11c-MyD88* dependent manner.** (a)  
1101 Schematic of OVA/IL33 mouse model of allergic asthma (top). Neutrophilic (bottom left) and  
1102 eosinophilic (bottom right) inflammation of the airway in WT, DC-KO, EC-KO, and *Myd88* null  
1103 mice sensitized with OVA/IL33 and challenged with OVA. Data shown are representative of two  
1104 experiments, n = 11 mice per group. (b) Relative *Ii1a* expression in purified ECs at 2h post-  
1105 sensitization and cDCs and AMs at 6h post-sensitization of the indicated mouse strains. For  
1106 purified AMs and cDCs, lungs from 3 mice were pooled prior to sorting each cell sample. For  
1107 each sorted cell type, n = 3 (ECs), n = 3-4 (cDCs) and n = 2 (AMs) unique sorts per group. MTI =  
1108 minimum threshold intensity for gene detection, \*\*\*\*p < 0.0001.

1109

1110 **Supplementary Table 1. Genes differentially expressed at steady state in lungs of WT mice**  
1111 **and mice having cell-specific deletion of *Myd88*.**

1112 Shown are genes whose expression in whole lung is significantly different at steady state  
1113 between WT mice and the indicated strains ( $\geq 1.5$  fold;  $p \leq 0.01$ ,  $MTI \geq 32$  for at least one group), as  
1114 determined by Nanostring analysis. The categories shown are the same as those in the Venn  
1115 diagram for the 0h time point in Figure 3b (top).

1116

1117 **Supplementary Table 2. Genes whose expression in whole lungs of WT mice is changed**  
1118 **by OVA/FLA.** Shown are genes whose expression is either increased (orange) or decreased  
1119 (blue) at 2h or at 6h post-OVA/FLA treatment ( $\geq 1.5$  fold;  $p \leq 0.01$ ,  $MTI \geq 32$  for at least one group).

1120

1121 **Supplementary Table 3. Genes whose expression in whole lung is affected at 2h post-**  
1122 **OVA/FLA by cell-specific *Myd88* deletion.** Shown are genes whose expression in whole lung at  
1123 2h post-OVA/FLA differs between WT and the indicated mouse strain(s) ( $\geq 1.5$  fold;  $p \leq 0.01$ ,  
1124  $MTI \geq 32$  for at least one group). The categories shown are the same as those in the Venn diagram  
1125 for the 2h time point in Figure 3b (bottom).

1126

1127 **Supplementary Table 4. Genes whose expression in sorted ECs is affected at 2h post-**  
1128 **OVA/FLA by cell-specific deletion of *Myd88*.** Shown are genes whose expression in sorted  
1129 ECs at 2h post-OVA/FLA differs between WT and the indicated mouse strain(s) ( $\geq 1.5$  fold;  
1130  $p \leq 0.01$ ,  $MTI \geq 32$  for at least one group). The categories shown are the same as those in the Venn  
1131 diagram for the 2h time point in Figure 3e.

1132

1133 **Supplementary Table 5. Genes whose expression in the whole lung is affected at 6h post-**  
1134 **OVA/FLA by cell-specific *Myd88* deletion.** Shown are genes whose expression in whole lung at  
1135 6h post-OVA/FLA differs between WT and the indicated mouse strain(s) ( $\geq 1.5$  fold;  $p \leq 0.01$ ,  
1136  $MTI \geq 32$  for at least one group). The categories shown are the same as those in the Venn diagram  
1137 for the 6h time point in Figure 4b.

1138

1139 **Supplementary Table 6. Genes whose expression in cDCs is affected at 6h post-OVA/FLA**  
1140 **by cell-specific *Myd88* deletion.** Shown are genes whose expression in sorted cDCs at 6h post-  
1141 OVA/FLA differs between WT and the indicated mouse strain(s) ( $\geq 1.5$  fold;  $p \leq 0.01$ ,  $MTI \geq 32$  for at  
1142 least one group). The categories shown are the same as those in the Venn diagram for the 6h  
1143 time point in Figure 4g.

1144

1145 **Supplementary Table 7. Genes whose expression in AMs is affected at 6h post-OVA/FLA**  
1146 **by cell-specific *Myd88* deletion.** Shown are genes whose expression in sorted AMs at 6h post-  
1147 OVA/FLA differs between WT and the indicated mouse strain(s) ( $\geq 1.5$  fold;  $p \leq 0.01$ ,  $MTI \geq 32$  for at  
1148 least one group). The categories shown are the same as those in the Venn diagram for the 6h  
1149 time point in Figure 4h.

1150

1151 **Supplementary Table 8. ATAC-seq peaks in cDCs are affected by cell-specific *Myd88***  
1152 **deletion.** Worksheets in file show genes whose ATAC-seq peaks in cDCs significantly differ  
1153 ( $p < 0.05$ ) for the following four comparisons: WT 0h vs DC-KO or EC-KO at 0h; and WT 6h vs DC-  
1154 KO or EC-KO at 6h. Genes are assigned to each peak, and the distance from the peak to TSS is  
1155 indicated.

1156

1157 **Supplementary Table 9. Mechanisms of transcriptional regulation associated with genes**  
1158 **with *MyD88*-dependent, differential ATAC-seq peaks in cDCs. (a-c)** Categories of  
1159 transcriptional regulation are shown for genes associated with genotype-dependent ATAC-seq  
1160 peaks at baseline (0h) and/or following 6h post-sensitization with OVA/FLA. Genes listed map to  
1161 ATAC-seq peaks that are different between between WT (reference) and (a) DC-KO at both 0h  
1162 and 6h, (b) DC-KO at 6h only, and (c) EC-KO at 6h only, as shown in Figure 5b. These genes are  
1163 further subdivided into genotypes depending on whether the genes are expressed or not, and  
1164 whether they are differentially expressed at baseline, or after induction by OVA/FLA.

1165

1166 **Supplementary Table 10. Control of gene expression in cDCs by cell-intrinsic**  
1167 **and -extrinsic MyD88 signaling.** Shown are genes whose expression in cDCs (based on  
1168 Affymetrix Whole Transcriptome Array 1.0) is dependent on MyD88 signaling in *Cd11c*-  
1169 expressing cells (left) or ECs (right). Expressed genes had a minimum bi-weight log<sub>2</sub> average  
1170 probe signal  $\geq 7$ . *Cd11c*-MyD88-dependent genes were defined as those having a ratio of  $\geq 2$  for  
1171 both DC-KO/WT and KO/WT, and a ratio of  $< 2$  for EC-KO/WT. EC-MyD88-dependent genes had  
1172 a ratio of  $\geq 2$  for both EC-KO/WT and KO/WT, and  $< 2$  for DC-KO/WT (as described in  
1173 Supplementary Methods). Fold-changes and p-values are shown for each genotype compared to  
1174 WT (reference) at 6h.

1175

1176 **Supplementary Resource. Online interactive display of Nanostring data for whole lung,**  
1177 **sorted ECs, cDCs, and AMs.** Gene expression data for whole lung at various time points, as  
1178 well as sorted ECs at 2h, cDCs at 6h, and AMs at 6h are included online:  
1179 <https://jmw86069.github.io/myd88-asthma/>

1180 Genes with significant differences in expression between genotypes are indicated with a bar. The  
1181 comparison groups, p-value, and fold-change can all be seen when hovering over this bar.  
1182 Significant differences are defined as 1.5-fold difference between groups,  $p < 0.01$ , with a  
1183 normalized MTI  $\geq 32$  (indicated by the dotted line) for at least one group in the comparison.

Supplementary Figure 1

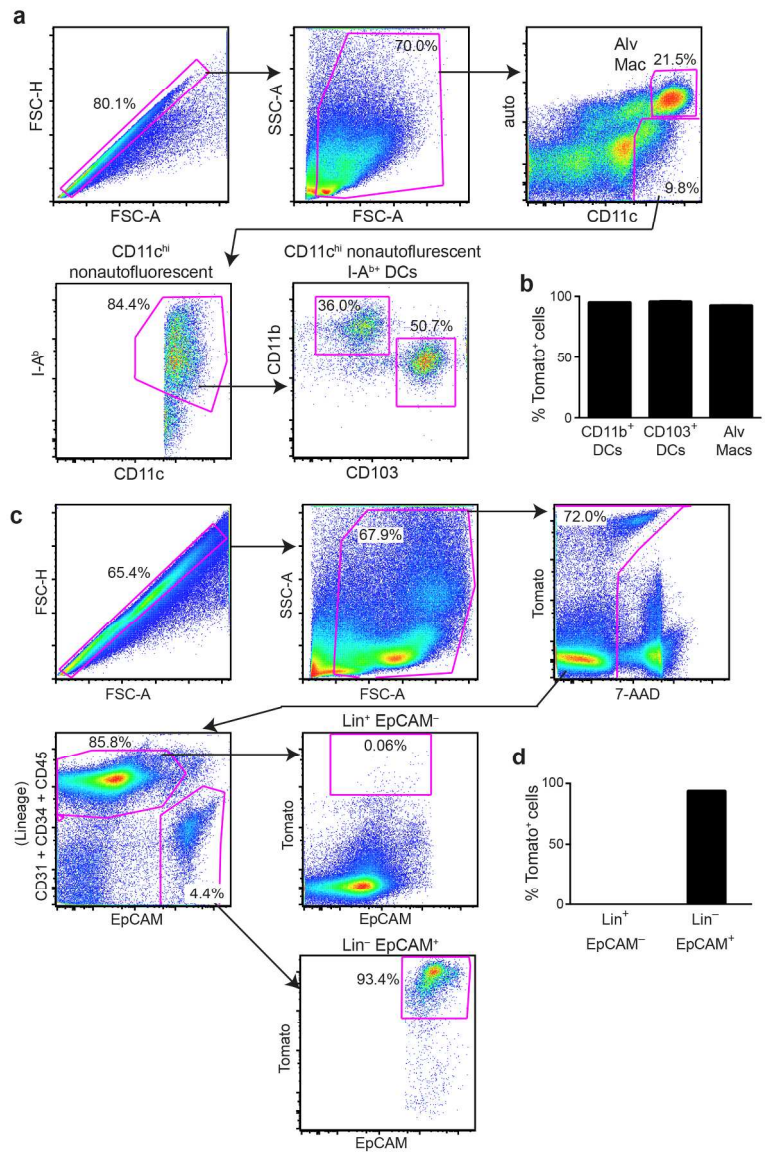

166x250mm (300 x 300 DPI)

## Supplementary Figure 2

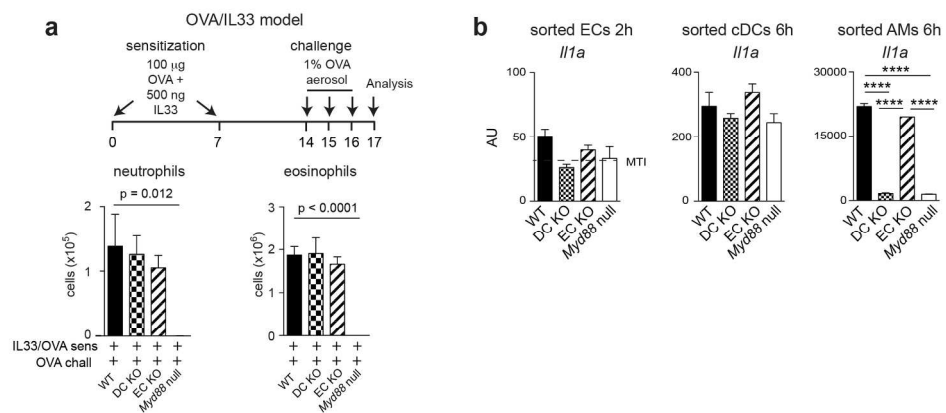

196x93mm (300 x 300 DPI)

Supplementary Table 1: Genes differentially expressed at steady state in lungs of WT mice and mice having cell-specific deletion of *Myd88*

| EC-KO | EC-KO & DC-KO | DC-KO  | EC-KO & <i>Myd88</i> null | EC-KO, DC-KO & <i>Myd88</i> null | DC-KO & <i>Myd88</i> null | <i>Myd88</i> null |
|-------|---------------|--------|---------------------------|----------------------------------|---------------------------|-------------------|
| Gzma  |               | Cd3e   | Il18rap                   | Stat4                            | Jak3                      | Cd109             |
| Klra7 |               | Cd5    |                           | Tlr9                             |                           | Cfb               |
|       |               | Gp1bb  |                           |                                  |                           | Il16              |
|       |               | Il1a   |                           |                                  |                           | Itga5             |
|       |               | Itgam  |                           |                                  |                           | Myd88             |
|       |               | Itgax  |                           |                                  |                           |                   |
|       |               | Nfatc2 |                           |                                  |                           |                   |

Supplementary Table 2: Genes whose expression in whole lungs of WT mice is changed by OVA/FLA

| 2 h vs 0 h |           |           | 6 h vs 0 h |           |          |           |
|------------|-----------|-----------|------------|-----------|----------|-----------|
| Decreased  | Increased |           | Decreased  | Increased |          |           |
| Ahr        | Batf      | Irgm1     | Ahr        | Batf      | Il12rb2  | Tagap     |
| Atm        | Batf3     | Itga5     | Atm        | Batf3     | Il13ra1  | Tap1      |
| Ccr11      | Bcl3      | Itgam     | Ccr6       | Bcl3      | Il15ra   | Tbk1      |
| Cd2        | Bcl6      | Jak2      | Ccr1       | Bcl6      | Il17ra   | Tbx21     |
| Cd27       | Ccl11     | Jak3      | Cd19       | Bid       | Il18rap  | Tgfb1     |
| Cd28       | Ccl12     | Lcp2      | Cd1d1      | Bst1      | Il1a     | Tgfb2     |
| H2-Ob      | Ccl19     | Lif       | Cd2        | C1qbp     | Il1b     | Tirap     |
| Ikzf2      | Ccl2      | Lilra6    | Cd209g     | C3        | Il1r1    | Tlr2      |
| Il12a      | Ccl20     | Lilrb3    | Cd27       | C8b       | Il1r2    | Tmem173   |
| Il7        | Ccl22     | Lilrb4    | Cd36       | Ccbp2     | Il1rap   | Tnf       |
| Maf        | Ccl3      | Litaf     | Cd5        | Ccl11     | Il1rn    | Tnfaip3   |
| Ms4a1      | Ccl4      | Ly96      | Cd55       | Ccl12     | Il23a    | Tnfaip6   |
| Tnfrsf13b  | Ccl5      | Mapk11    | Cd79b      | Ccl19     | Il2ra    | Tnfrsf11a |
|            | Ccl7      | Mapkapk2  | Cd97       | Ccl2      | Il2rb    | Tnfrsf14  |
|            | Ccl9      | Marco     | Cx3cr1     | Ccl20     | Il33     | Tnfrsf1b  |
|            | Ccr12     | Msr1      | Cxcl12     | Ccl22     | Il4ra    | Tnfrsf4   |
|            | Cd109     | Mx1       | Cxcl15     | Ccl3      | Il6      | Tnfrsf9   |
|            | Cd14      | Myd88     | Cxcr3      | Ccl4      | Il6ra    | Tnfsf14   |
|            | Cd274     | Ncf4      | Cxcr6      | Ccl5      | Il7r     | Tnfsf15   |
|            | Cd44      | Nfil3     | Dpp4       | Ccl6      | Irak2    | Traf3     |
|            | Cd69      | Nfkb1     | Fcgr1      | Ccl7      | Irak3    | Traf6     |
|            | Cd80      | Nfkb2     | Gpr44      | Ccl9      | Irf1     | Trem1     |
|            | Cd83      | Nfkbia    | Gusb       | Ccr12     | Irf5     | Tyrobp    |
|            | Cd86      | Nfkbiz    | H2-Ob      | Cd109     | Irgm1    | Vcam1     |
|            | Cdkn1a    | Nod2      | Hc         | Cd14      | Itga2b   | Xbp1      |
|            | Ceacam1   | Notch1    | Hfe        | Cd244     | Itga5    |           |
|            | Cebpb     | Pigr      | Icam2      | Cd24a     | Itgam    |           |
|            | Cfb       | Plaur     | Ikzf2      | Cd274     | Itgax    |           |
|            | Cish      | Ptafr     | Il18       | Cd3eap    | Itgb2    |           |
|            | Clec4e    | Ptger4    | Il27ra     | Cd44      | Jak2     |           |
|            | Clec5a    | Ptgs2     | Il7        | Cd69      | Jak3     |           |
|            | Clu       | Ptpn2     | Kit        | Cd80      | Klra7    |           |
|            | Csf1      | Rela      | Lilra5     | Cd82      | Lcp2     |           |
|            | Csf2      | Relb      | Maf        | Cd83      | Lif      |           |
|            | Csf2rb    | S100a8    | Mr1        | Cd86      | Lilra6   |           |
|            | Csf3r     | S100a9    | Ms4a1      | Cd99      | Lilrb3   |           |
|            | Cxcl1     | Sele      | Nox4       | Cdkn1a    | Lilrb4   |           |
|            | Cxcl10    | Smad3     | Npc1       | Ceacam1   | Litaf    |           |
|            | Cxcl11    | Socs1     | Pax5       | Cebpb     | Ltb4r1   |           |
|            | Cxcl13    | Socs3     | Prim1      | Cfb       | Mapk11   |           |
|            | Cxcl3     | Stat2     | Sigirr     | Cish      | Mapkapk2 |           |
|            | Cxcl9     | Stat3     | Tgfb3      | Clec4e    | Marco    |           |
|            | Cxcr1     | Stat4     | Tnfrsf13b  | Clec5a    | Mbp      |           |
|            | Cxcr2     | Stat5a    | Tnfsf10    | Clu       | Msr1     |           |
|            | Ebi3      | Syk       | Tnfsf12    | Crif2     | Mx1      |           |
|            | Entpd1    | Tagap     | Traf5      | Csf1      | Myd88    |           |
|            | Fas       | Tbx21     | Xcr1       | Csf2      | Ncf4     |           |
|            | Fcgr3     | Tirap     |            | Csf2rb    | Nfil3    |           |
|            | Fcgr4     | Tlr2      |            | Csf3r     | Nfkb1    |           |
|            | Fkbp5     | Tmem173   |            | Ctla4     | Nfkb2    |           |
|            | H2-Q10    | Tnf       |            | Cxcl1     | Nfkbia   |           |
|            | Hamp      | Tnfaip3   |            | Cxcl10    | Nfkbiz   |           |
|            | Hif1a     | Tnfaip6   |            | Cxcl13    | Nod2     |           |
|            | Icam1     | Tnfrsf11a |            | Cxcl3     | Notch1   |           |
|            | Icam4     | Tnfrsf1b  |            | Cxcl9     | Notch2   |           |
|            | Icosl     | Tnfrsf9   |            | Cxcr1     | Nt5e     |           |
|            | Ifi204    | Tnfsf14   |            | Cxcr2     | Pigr     |           |
|            | Ifit2     | Tnfsf15   |            | Ebi3      | Plaur    |           |
|            | Ifitm1    | Trem1     |            | Entpd1    | Pol1r1b  |           |
|            | Ifngr2    | Vcam1     |            | Fas       | PbPb     |           |
|            | Ikbke     | Xbp1      |            | Fcer1g    | Prkcd    |           |
|            | Ikzf4     |           |            | Fcgr2b    | Ptafr    |           |
|            | Il10ra    |           |            | Fcgr3     | Ptger4   |           |
|            | Il10rb    |           |            | Fcgr4     | Ptgs2    |           |
|            | Il12b     |           |            | Fkbp5     | Ptpn2    |           |
|            | Il13ra1   |           |            | Gapdh     | Ptpn22   |           |
|            | Il17ra    |           |            | Gm10499   | Ptprc    |           |
|            | Il18rap   |           |            | Gzmb      | Rela     |           |
|            | Il1a      |           |            | H2-Q10    | Relb     |           |
|            | Il1b      |           |            | Hamp      | S100a8   |           |
|            | Il1r1     |           |            | Hcst      | S100a9   |           |
|            | Il1r2     |           |            | Hif1a     | Sele     |           |
|            | Il1rn     |           |            | Hprt      | Sell     |           |
|            | Il2ra     |           |            | Icam1     | Selpig   |           |
|            | Il33      |           |            | Icam4     | Smad3    |           |
|            | Il4ra     |           |            | Icosl     | Socs1    |           |
|            | Il6       |           |            | Ifi204    | Socs3    |           |
|            | Irak2     |           |            | Ifit2     | Stat2    |           |
|            | Irak3     |           |            | Ifitm1    | Stat3    |           |
|            | Irf1      |           |            | Ikbke     | Stat4    |           |
|            | Irf5      |           |            | Ikzf4     | Stat5a   |           |
|            | Irf7      |           |            | Il10ra    | Syk      |           |



Supplementary Table 3: Genes whose expression in whole lung is affected at 2h post-OVA/FLA by cell-specific *Myd88* deletion

| EC-KO  | EC-KO & DC-KO | DC-KO | EC-KO & <i>Myd88</i> null | EC-KO, DC-KO & <i>Myd88</i> null | DC-KO & <i>Myd88</i> null | <i>Myd88</i> null |
|--------|---------------|-------|---------------------------|----------------------------------|---------------------------|-------------------|
| Batf3  |               | Il12b | Ccl11                     | Il1b                             | Ccl22                     | Batf              |
| Ccl6   |               | Itgax | Ccl20                     | Ptfar                            | Ccl3                      | Bcl3              |
| Cd244  |               | Marco | Cd14                      |                                  | Ccl4                      | Bid               |
| Cd3eap |               |       | Cd44                      |                                  | Cxcl3                     | C3                |
| Clec5a |               |       | Cd80                      |                                  | Ebi3                      | Ccl12             |
| Tlr8   |               |       | Cd83                      |                                  | Emr1                      | Ccl19             |
|        |               |       | Cdkn1a                    |                                  | Il1a                      | Ccl2              |
|        |               |       | Ceacam1                   |                                  | Tnf                       | Ccl24             |
|        |               |       | Clu                       |                                  | Tnfaip3                   | Ccl7              |
|        |               |       | Csf2                      |                                  |                           | Ccl8              |
|        |               |       | Csf3r                     |                                  |                           | Ccr12             |
|        |               |       | Cxcl1                     |                                  |                           | Cd53              |
|        |               |       | Cxcr2                     |                                  |                           | Cebpb             |
|        |               |       | Fcgr3                     |                                  |                           | Cfb               |
|        |               |       | Fcgr4                     |                                  |                           | Cish              |
|        |               |       | H2-Q10                    |                                  |                           | Clec4e            |
|        |               |       | Ikake                     |                                  |                           | Csf1              |
|        |               |       | Il18rap                   |                                  |                           | Csf2rb            |
|        |               |       | Il1r2                     |                                  |                           | Cxcr1             |
|        |               |       | Il6                       |                                  |                           | Cxcr3             |
|        |               |       | Irak2                     |                                  |                           | Fas               |
|        |               |       | Itgam                     |                                  |                           | Gpi1              |
|        |               |       | Lilra6                    |                                  |                           | Hamp              |
|        |               |       | Lilrb4                    |                                  |                           | Hcst              |
|        |               |       | Nfil3                     |                                  |                           | Hif1a             |
|        |               |       | Pigr                      |                                  |                           | Icam1             |
|        |               |       | Plaur                     |                                  |                           | Icam4             |
|        |               |       | Ptgs2                     |                                  |                           | Ifitm1            |
|        |               |       | S100a8                    |                                  |                           | Ifngr2            |
|        |               |       | S100a9                    |                                  |                           | Ikzf4             |
|        |               |       | Sell                      |                                  |                           | Il17ra            |
|        |               |       | Socs3                     |                                  |                           | Il1rn             |
|        |               |       | Tnfrsf9                   |                                  |                           | Il4ra             |
|        |               |       | Trem1                     |                                  |                           | Il6st             |
|        |               |       | Tyrobp                    |                                  |                           | Irak3             |
|        |               |       |                           |                                  |                           | Irf1              |
|        |               |       |                           |                                  |                           | Irf5              |
|        |               |       |                           |                                  |                           | Jak2              |
|        |               |       |                           |                                  |                           | Lif               |
|        |               |       |                           |                                  |                           | Lilrb3            |
|        |               |       |                           |                                  |                           | Litaf             |
|        |               |       |                           |                                  |                           | Mapk11            |
|        |               |       |                           |                                  |                           | Msr1              |
|        |               |       |                           |                                  |                           | Myd88             |
|        |               |       |                           |                                  |                           | Ncf4              |
|        |               |       |                           |                                  |                           | Nfkb1             |
|        |               |       |                           |                                  |                           | Nfkb2             |
|        |               |       |                           |                                  |                           | Nfkbia            |
|        |               |       |                           |                                  |                           | Nfkbiz            |
|        |               |       |                           |                                  |                           | Nod2              |
|        |               |       |                           |                                  |                           | Plau              |
|        |               |       |                           |                                  |                           | Ptger4            |
|        |               |       |                           |                                  |                           | Ptpn2             |
|        |               |       |                           |                                  |                           | Rela              |
|        |               |       |                           |                                  |                           | Relb              |
|        |               |       |                           |                                  |                           | Sele              |
|        |               |       |                           |                                  |                           | Smad3             |
|        |               |       |                           |                                  |                           | Stat5a            |
|        |               |       |                           |                                  |                           | Tbx21             |
|        |               |       |                           |                                  |                           | Tlr2              |
|        |               |       |                           |                                  |                           | Tmem173           |
|        |               |       |                           |                                  |                           | Tnfaip6           |
|        |               |       |                           |                                  |                           | Tnfrsf11a         |
|        |               |       |                           |                                  |                           | Tnfrsf1b          |
|        |               |       |                           |                                  |                           | Tnfsf14           |
|        |               |       |                           |                                  |                           | Tnfsf15           |
|        |               |       |                           |                                  |                           | Tslp              |
|        |               |       |                           |                                  |                           | Vcam1             |
|        |               |       |                           |                                  |                           | Xbp1              |

Supplementary Table 4: Genes whose expression in sorted ECs is affected at 2h post-OVA/FLA by cell-specific deletion of *Myd88*

| EC-KO   | EC-KO & DC-KO | DC-KO | EC-KO & <i>Myd88</i> null | EC-KO, DC-KO & <i>Myd88</i> null | DC-KO & <i>Myd88</i> null | <i>Myd88</i> null |
|---------|---------------|-------|---------------------------|----------------------------------|---------------------------|-------------------|
| Cd3eap  |               |       | Abcb10                    |                                  |                           | Atm               |
| Ifngr1  |               |       | Adal                      |                                  |                           | Batf              |
| Ikzf4   |               |       | Ccl20                     |                                  |                           | Bcap31            |
| Il15ra  |               |       | Ccr6                      |                                  |                           | Bcl2              |
| Irf1    |               |       | Cd14                      |                                  |                           | Bcl3              |
| Stat3   |               |       | Cd164                     |                                  |                           | Bid               |
| Tmem173 |               |       | Cd44                      |                                  |                           | C1ra              |
|         |               |       | Cd79b                     |                                  |                           | C3                |
|         |               |       | Cd81                      |                                  |                           | C6                |
|         |               |       | Cd83                      |                                  |                           | Casp2             |
|         |               |       | Ceacam1                   |                                  |                           | Casp3             |
|         |               |       | Cfp                       |                                  |                           | Casp8             |
|         |               |       | Ciita                     |                                  |                           | Ccl2              |
|         |               |       | Clu                       |                                  |                           | Ccl2              |
|         |               |       | Cradd                     |                                  |                           | Cd274             |
|         |               |       | Csf1                      |                                  |                           | Cd55              |
|         |               |       | Csf1r                     |                                  |                           | Cd82              |
|         |               |       | Csf2                      |                                  |                           | Cfb               |
|         |               |       | Cul9                      |                                  |                           | Chuk              |
|         |               |       | Cxcl3                     |                                  |                           | Cx3cl1            |
|         |               |       | Entpd1                    |                                  |                           | Cxcl1             |
|         |               |       | Ets1                      |                                  |                           | Cxcl10            |
|         |               |       | Fcgrt                     |                                  |                           | Cxcr4             |
|         |               |       | Ifngr2                    |                                  |                           | Dpp4              |
|         |               |       | Ikzf2                     |                                  |                           | Fadd              |
|         |               |       | Il11ra1                   |                                  |                           | Fas               |
|         |               |       | Il17re                    |                                  |                           | Fyn               |
|         |               |       | Il18r1                    |                                  |                           | H2-Eb1            |
|         |               |       | Il4ra                     |                                  |                           | Hc                |
|         |               |       | Irak2                     |                                  |                           | Hfe               |
|         |               |       | Irak4                     |                                  |                           | Icam1             |
|         |               |       | Irf5                      |                                  |                           | Ifitm1            |
|         |               |       | Itga6                     |                                  |                           | Ifnar2            |
|         |               |       | Jak3                      |                                  |                           | Igf2r             |
|         |               |       | Lif                       |                                  |                           | Ikbke             |
|         |               |       | Ly96                      |                                  |                           | Ikbkg             |
|         |               |       | Mapk14                    |                                  |                           | Il18rap           |
|         |               |       | Mme                       |                                  |                           | Il1b              |
|         |               |       | Nfil3                     |                                  |                           | Il1r1             |
|         |               |       | Nfkb1                     |                                  |                           | Il6ra             |
|         |               |       | Npc1                      |                                  |                           | Irak1             |
|         |               |       | Pdgfb                     |                                  |                           | Irak3             |
|         |               |       | Pigr                      |                                  |                           | Irf3              |
|         |               |       | Ptafr                     |                                  |                           | Jak1              |
|         |               |       | Ptpn6                     |                                  |                           | Jak2              |
|         |               |       | Sigirr                    |                                  |                           | Ltbr              |
|         |               |       | Smad5                     |                                  |                           | Map4k2            |
|         |               |       | Stat5a                    |                                  |                           | Map4k4            |
|         |               |       | Tfrc                      |                                  |                           | Mapk1             |
|         |               |       | Tgfb2                     |                                  |                           | Mapk11            |
|         |               |       | Tlr2                      |                                  |                           | Mif               |
|         |               |       | Tlr3                      |                                  |                           | Myd88             |
|         |               |       | Tnf                       |                                  |                           | Nfat3             |
|         |               |       | Tnfrsf1b                  |                                  |                           | Nfkb2             |
|         |               |       | Tnfrsf9                   |                                  |                           | Nfkbia            |
|         |               |       | Tnfsf10                   |                                  |                           | Nos2              |
|         |               |       | Tnfsf12                   |                                  |                           | Notch2            |
|         |               |       | Tollip                    |                                  |                           | Phlpp1            |
|         |               |       |                           |                                  |                           | Phlpp2            |
|         |               |       |                           |                                  |                           | Plau              |
|         |               |       |                           |                                  |                           | Pml               |
|         |               |       |                           |                                  |                           | Prdm1             |
|         |               |       |                           |                                  |                           | Prim1             |
|         |               |       |                           |                                  |                           | Psm5              |
|         |               |       |                           |                                  |                           | Psm7              |
|         |               |       |                           |                                  |                           | Psm7              |
|         |               |       |                           |                                  |                           | Ptk2              |
|         |               |       |                           |                                  |                           | Ptpn2             |
|         |               |       |                           |                                  |                           | Relb              |
|         |               |       |                           |                                  |                           | Runx1             |
|         |               |       |                           |                                  |                           | Ski               |
|         |               |       |                           |                                  |                           | Stat1             |
|         |               |       |                           |                                  |                           | Tcf4              |
|         |               |       |                           |                                  |                           | Tgfb1             |
|         |               |       |                           |                                  |                           | Tlr5              |
|         |               |       |                           |                                  |                           | Tnfaip3           |
|         |               |       |                           |                                  |                           | Tnfrsf11a         |
|         |               |       |                           |                                  |                           | Traf1             |
|         |               |       |                           |                                  |                           | Ube2l3            |
|         |               |       |                           |                                  |                           | Zbtb7b            |

Supplementary Table 5: Genes whose expression in the whole lung is affected at 6h post-OVA/FLA by cell-specific *Myd88* deletion

| EC-KO   | EC-KO & DC-KO | DC-KO   | EC-KO & <i>Myd88</i> null | EC-KO, DC-KO & <i>Myd88</i> null | DC-KO & <i>Myd88</i> null | <i>Myd88</i> null |
|---------|---------------|---------|---------------------------|----------------------------------|---------------------------|-------------------|
| Adal    | Cr2           | Btla    | Cd22                      | Ahr                              | Ccl8                      | Batf3             |
| Ccl12   | Hamp          | Cd69    | Clu                       | Atm                              | Cd244                     | C3                |
| Ccl7    | Maf           | Hcst    | Gp1bb                     | Batf                             | Cd53                      | C8b               |
| Ccr5    | Marco         | Il2rb   | Il21r                     | Bcl3                             | Csf1                      | Ccl2              |
| Ccr6    | Prim1         | Itgax   | Il27ra                    | Bid                              | Cxcl3                     | Ccl22             |
| Cd209g  | Xcl1          | Sell    | Irf4                      | Bst1                             | Fcer1g                    | Ccl5              |
| Cd48    |               | Tgfb2   | Lck                       | Bst2                             | Hlx                       | Ccl9              |
| Cd55    |               | Tgfb3   | Ly86                      | Ccbp2                            | Icos                      | Cd1d1             |
| Cd7     |               | Tnfaip6 | Pigr                      | Ccl11                            | Ifi35                     | Cd2               |
| Cxcr6   |               |         | Ppbp                      | Ccl19                            | Ifih1                     | Cfb               |
| Fadd    |               |         | Tlr9                      | Ccl20                            | Il1rl2                    | Cfd               |
| Gpr183  |               |         | Tnfrsf11a                 | Ccl3                             | Il33                      | Cfp               |
| H2-DMb2 |               |         | Tnfrsf13b                 | Ccl4                             | Il6                       | Cxcl13            |
| Ikzf3   |               |         | Tnfrsf13c                 | Ccl6                             | Il7r                      | Cxcl9             |
| Il12b   |               |         | Tnfrsf9                   | Ccr2                             | Itgb2                     | Dpp4              |
| Ir1rl1  |               |         |                           | Ccr1                             | Lif                       | Emr1              |
| Itga2b  |               |         |                           | Ccr2                             | Mapk11                    | Eomes             |
| Nt5e    |               |         |                           | Cd14                             | Mbp                       | Fcgrt             |
| Tlr1    |               |         |                           | Cd163                            | Ncf4                      | Gzma              |
| Tyk2    |               |         |                           | Cd19                             | Nod2                      | Ifngr1            |
|         |               |         |                           | Cd24a                            | Nox4                      | Il6st             |
|         |               |         |                           | Cd27                             | Tmem173                   | Irgm1             |
|         |               |         |                           | Cd44                             | Tslp                      | Jak3              |
|         |               |         |                           | Cd79b                            |                           | Klrd1             |
|         |               |         |                           | Cd80                             |                           | Lilra6            |
|         |               |         |                           | Cd83                             |                           | Ltb4r1            |
|         |               |         |                           | Cd97                             |                           | Ltbr              |
|         |               |         |                           | Cdkn1a                           |                           | Msr1              |
|         |               |         |                           | Ceacam1                          |                           | Polr1b            |
|         |               |         |                           | Cebpb                            |                           | Runx1             |
|         |               |         |                           | Ciita                            |                           | Stat5a            |
|         |               |         |                           | Cish                             |                           | Traf3             |
|         |               |         |                           | Clec4e                           |                           |                   |
|         |               |         |                           | Clec5a                           |                           |                   |
|         |               |         |                           | Crlf2                            |                           |                   |
|         |               |         |                           | Csf2                             |                           |                   |
|         |               |         |                           | Csf2rb                           |                           |                   |
|         |               |         |                           | Csf3r                            |                           |                   |
|         |               |         |                           | Cx3cr1                           |                           |                   |
|         |               |         |                           | Cxcl1                            |                           |                   |
|         |               |         |                           | Cxcr1                            |                           |                   |
|         |               |         |                           | Cxcr2                            |                           |                   |
|         |               |         |                           | Cxcr3                            |                           |                   |
|         |               |         |                           | Cxcr5                            |                           |                   |
|         |               |         |                           | Ddx58                            |                           |                   |
|         |               |         |                           | Ebi3                             |                           |                   |
|         |               |         |                           | Entpd1                           |                           |                   |
|         |               |         |                           | Fas                              |                           |                   |
|         |               |         |                           | Fcgr1                            |                           |                   |
|         |               |         |                           | Fcgr2b                           |                           |                   |
|         |               |         |                           | Fcgr3                            |                           |                   |
|         |               |         |                           | Fcgr4                            |                           |                   |
|         |               |         |                           | Fkbp5                            |                           |                   |
|         |               |         |                           | H2-Ob                            |                           |                   |
|         |               |         |                           | H2-Q10                           |                           |                   |
|         |               |         |                           | Hif1a                            |                           |                   |
|         |               |         |                           | Icam1                            |                           |                   |
|         |               |         |                           | Icam4                            |                           |                   |
|         |               |         |                           | Ifit2                            |                           |                   |
|         |               |         |                           | Ifitm1                           |                           |                   |
|         |               |         |                           | Ikbke                            |                           |                   |
|         |               |         |                           | Ikzf2                            |                           |                   |
|         |               |         |                           | Ikzf4                            |                           |                   |
|         |               |         |                           | Il10ra                           |                           |                   |
|         |               |         |                           | Il13ra1                          |                           |                   |
|         |               |         |                           | Il15ra                           |                           |                   |
|         |               |         |                           | Il17ra                           |                           |                   |
|         |               |         |                           | Il17re                           |                           |                   |
|         |               |         |                           | Il18rap                          |                           |                   |
|         |               |         |                           | Il1a                             |                           |                   |
|         |               |         |                           | Il1b                             |                           |                   |
|         |               |         |                           | Il1r1                            |                           |                   |
|         |               |         |                           | Il1r2                            |                           |                   |
|         |               |         |                           | Il1rap                           |                           |                   |
|         |               |         |                           | Il1rn                            |                           |                   |
|         |               |         |                           | Il23a                            |                           |                   |
|         |               |         |                           | Il4ra                            |                           |                   |
|         |               |         |                           | Il6ra                            |                           |                   |
|         |               |         |                           | Il7                              |                           |                   |
|         |               |         |                           | Irak2                            |                           |                   |
|         |               |         |                           | Irak3                            |                           |                   |

| AEC-KO | AEC-KO & DC-KO | DC-KO | AEC-KO & Myd88 null | AEC-KO, DC-KO & Myd88 null | DC-KO & Myd88 null | Myd88 null |
|--------|----------------|-------|---------------------|----------------------------|--------------------|------------|
|        |                |       |                     | Irf7                       |                    |            |
|        |                |       |                     | Itga5                      |                    |            |
|        |                |       |                     | Itgam                      |                    |            |
|        |                |       |                     | Jak2                       |                    |            |
|        |                |       |                     | Lcp2                       |                    |            |
|        |                |       |                     | Lilrb3                     |                    |            |
|        |                |       |                     | Lilrb4                     |                    |            |
|        |                |       |                     | Litaf                      |                    |            |
|        |                |       |                     | Ltb                        |                    |            |
|        |                |       |                     | Map4k4                     |                    |            |
|        |                |       |                     | Mapkapk2                   |                    |            |
|        |                |       |                     | Ms4a1                      |                    |            |
|        |                |       |                     | Mx1                        |                    |            |
|        |                |       |                     | Myd88                      |                    |            |
|        |                |       |                     | Nfil3                      |                    |            |
|        |                |       |                     | Nfkb1                      |                    |            |
|        |                |       |                     | Nfkb2                      |                    |            |
|        |                |       |                     | Nfkbia                     |                    |            |
|        |                |       |                     | Nfkbiz                     |                    |            |
|        |                |       |                     | Notch2                     |                    |            |
|        |                |       |                     | Pax5                       |                    |            |
|        |                |       |                     | Plaur                      |                    |            |
|        |                |       |                     | Pml                        |                    |            |
|        |                |       |                     | Psmb10                     |                    |            |
|        |                |       |                     | Psmb9                      |                    |            |
|        |                |       |                     | Platr                      |                    |            |
|        |                |       |                     | Ptger4                     |                    |            |
|        |                |       |                     | Ptgs2                      |                    |            |
|        |                |       |                     | Ptpn2                      |                    |            |
|        |                |       |                     | Ptpn22                     |                    |            |
|        |                |       |                     | Rela                       |                    |            |
|        |                |       |                     | Relb                       |                    |            |
|        |                |       |                     | S100a8                     |                    |            |
|        |                |       |                     | S100a9                     |                    |            |
|        |                |       |                     | Smad3                      |                    |            |
|        |                |       |                     | Socs3                      |                    |            |
|        |                |       |                     | Stat1                      |                    |            |
|        |                |       |                     | Stat2                      |                    |            |
|        |                |       |                     | Stat3                      |                    |            |
|        |                |       |                     | Syk                        |                    |            |
|        |                |       |                     | Taqap                      |                    |            |
|        |                |       |                     | Tbk1                       |                    |            |
|        |                |       |                     | Tirap                      |                    |            |
|        |                |       |                     | Tlr2                       |                    |            |
|        |                |       |                     | Tlr3                       |                    |            |
|        |                |       |                     | Tnf                        |                    |            |
|        |                |       |                     | Tnfaip3                    |                    |            |
|        |                |       |                     | Tnfrsf1b                   |                    |            |
|        |                |       |                     | Tnfrsf4                    |                    |            |
|        |                |       |                     | Tnfrsf10                   |                    |            |
|        |                |       |                     | Tnfrsf14                   |                    |            |
|        |                |       |                     | Tnfrsf15                   |                    |            |
|        |                |       |                     | Traf5                      |                    |            |
|        |                |       |                     | Traf6                      |                    |            |
|        |                |       |                     | Trem1                      |                    |            |
|        |                |       |                     | Tyrobp                     |                    |            |
|        |                |       |                     | Xbp1                       |                    |            |
|        |                |       |                     | Xcr1                       |                    |            |



Supplementary Table 7: Genes whose expression in AMs is affected at 6h post-OVA/FLA by cell-specific *Myd88* deletion

| EC-KO | EC-KO & DC-KO | DC-KO   | EC-KO & <i>Myd88</i> null | EC-KO, DC-KO & <i>Myd88</i> null | DC-KO & <i>Myd88</i> null | <i>Myd88</i> null |
|-------|---------------|---------|---------------------------|----------------------------------|---------------------------|-------------------|
| C1qbp | Ccl6          | Bst1    | Batf3                     | Ahr                              | Bcl3                      | Abi1              |
| C2    | Cfb           | Casp8   | Ccr2                      | Ccl9                             | Casp3                     | Arhgdib           |
| C3    | Cybb          | Cd244   | Cd1d1                     | Clec4e                           | Ccl3                      | Batf              |
| Ebi3  | Fcgr2b        | Cd24a   | Fkbp5                     | Hamp                             | Ccr5                      | Bst2              |
| Emr1  | Marco         | Fcgr3   | Itga4                     | Ifit2                            | Ccl2                      | Casp1             |
| Gpi1  | Nt5e          | Il12b   | Pou2f2                    | Ikake                            | Cd164                     | Ccl4              |
| Ncf4  | Tgfbr1        | Il17ra  | S100a9                    | Il6                              | Cd2                       | Cish              |
| Plaur |               | Il6st   |                           | Irf4                             | Cd40                      | Cx3cl1            |
|       |               | Irak2   |                           | Ptgs2                            | Cd81                      | Cxcl13            |
|       |               | Itgax   |                           | Tlr5                             | Cdkn1a                    | Cxcl9             |
|       |               | Lcp2    |                           | Traf1                            | Cfp                       | Ddx58             |
|       |               | Mif     |                           | Traf5                            | Ctnnb1                    | Entpd1            |
|       |               | Stat3   |                           |                                  | Ctsc                      | Fcgr1             |
|       |               | Tnfsf14 |                           |                                  | Cxcl1                     | Il1m              |
|       |               | Xbp1    |                           |                                  | Cxcl3                     | Irak1             |
|       |               |         |                           |                                  | Cxcr1                     | Irf7              |
|       |               |         |                           |                                  | Cxcr2                     | Itga6             |
|       |               |         |                           |                                  | Cxcr4                     | Itgal             |
|       |               |         |                           |                                  | Fas                       | Itgb2             |
|       |               |         |                           |                                  | Fcgr4                     | Lilra5            |
|       |               |         |                           |                                  | Fcgrt                     | Map4k1            |
|       |               |         |                           |                                  | H2-DMa                    | Msr1              |
|       |               |         |                           |                                  | Hfe                       | Pecam1            |
|       |               |         |                           |                                  | Icam1                     | Psmb9             |
|       |               |         |                           |                                  | Icam4                     | Ptprc             |
|       |               |         |                           |                                  | Icosl                     | S100a8            |
|       |               |         |                           |                                  | Ifngr1                    | Serping1          |
|       |               |         |                           |                                  | Il13ra1                   | Spn               |
|       |               |         |                           |                                  | Il16                      | Stat1             |
|       |               |         |                           |                                  | Il18                      | Syk               |
|       |               |         |                           |                                  | Il1a                      | Tfrc              |
|       |               |         |                           |                                  | Il1b                      | Tlr3              |
|       |               |         |                           |                                  | Il23a                     | Tlr4              |
|       |               |         |                           |                                  | Il6ra                     | Tlr9              |
|       |               |         |                           |                                  | Irak3                     | Tnfsf12           |
|       |               |         |                           |                                  | Irf1                      | Tnfsf13b          |
|       |               |         |                           |                                  | Irf8                      | Traf6             |
|       |               |         |                           |                                  | Itga5                     |                   |
|       |               |         |                           |                                  | Jak2                      |                   |
|       |               |         |                           |                                  | Lair1                     |                   |
|       |               |         |                           |                                  | Ly86                      |                   |
|       |               |         |                           |                                  | Mx1                       |                   |
|       |               |         |                           |                                  | Myd88                     |                   |
|       |               |         |                           |                                  | Nfkb1                     |                   |
|       |               |         |                           |                                  | Nfkb2                     |                   |
|       |               |         |                           |                                  | Nfkbia                    |                   |
|       |               |         |                           |                                  | Nfkbiz                    |                   |
|       |               |         |                           |                                  | Nod2                      |                   |
|       |               |         |                           |                                  | Npc1                      |                   |
|       |               |         |                           |                                  | Pdgfb                     |                   |
|       |               |         |                           |                                  | Pml                       |                   |
|       |               |         |                           |                                  | Prdm1                     |                   |
|       |               |         |                           |                                  | Ptafr                     |                   |
|       |               |         |                           |                                  | Relb                      |                   |
|       |               |         |                           |                                  | Runx1                     |                   |
|       |               |         |                           |                                  | Ski                       |                   |
|       |               |         |                           |                                  | Socs3                     |                   |
|       |               |         |                           |                                  | Tgfb2                     |                   |
|       |               |         |                           |                                  | Tgfb1                     |                   |
|       |               |         |                           |                                  | Tgfb2                     |                   |
|       |               |         |                           |                                  | Tlr8                      |                   |
|       |               |         |                           |                                  | Tnf                       |                   |
|       |               |         |                           |                                  | Tnfai3                    |                   |
|       |               |         |                           |                                  | Tnfrsf1b                  |                   |
|       |               |         |                           |                                  | Tnfsf15                   |                   |
|       |               |         |                           |                                  | Traf3                     |                   |
|       |               |         |                           |                                  | Tyrobp                    |                   |

**Table S9. Mechanisms of transcriptional regulation associated with genes with MyD88-dependent, differential ATAC-seq peaks in cDCs  
a) DC-KO (0h & 6h)**

| Expressed (above MTI)      |                                 |                                |                                            |                                |                           |                                |                 | Below MTI                      | insufficient # of probes |        |
|----------------------------|---------------------------------|--------------------------------|--------------------------------------------|--------------------------------|---------------------------|--------------------------------|-----------------|--------------------------------|--------------------------|--------|
| 58 genes                   |                                 |                                |                                            |                                |                           |                                |                 |                                |                          |        |
| No differential expression | Baseline different; not induced | ANOVA p-value (WT0h v CD11c0h) | Induced through Transcriptional Initiation | ANOVA p-value (WT6h v CD11c6h) | Induced by RNA elongation | ANOVA p-value (WT6h v CD11c6h) | Induced-complex | ANOVA p-value (WT6h v CD11c6h) |                          |        |
| 24 genes                   | 15 genes                        |                                | 5 genes                                    |                                | 7 genes                   |                                | 7 genes         |                                | 26 genes                 | 1 gene |
| Apold1                     | Arl5c                           | 0.010062                       | Ccl22                                      | 0.174339                       | Ankrd33b                  | 0.055564                       | Car13           | 0.11612                        | 1700022E09Rik            | Fjx1   |
| Cd2                        | Ccl5                            | 0.190427                       | Cd40                                       | 0.002432                       | Ccr7                      | 0.14106                        | Fas             | 0.011033                       | 1700120G07Rik            |        |
| Ctf1                       | Ccr12                           | 0.028973                       | Cd69                                       | 0.198167                       | Ehf                       | 0.047722                       | Foxp4           | 0.003958                       | 1700126H18Rik            |        |
| Cxcl11                     | Cxcl9                           | 0.133683                       | Gem                                        | 0.025731                       | Hamp                      | 0.073758                       | Mab2113         | 0.04563                        | 5730403I07Rik            |        |
| Cxcr5                      | Cyba                            | 0.623621                       | Pla1a                                      | 0.035857                       | IL4i1                     | 0.064785                       | Pcgf5           | 0.035548                       | Adamts4                  |        |
| Cygb                       | Ebi3                            | 0.108902                       |                                            |                                | Mmp25                     | 0.008067                       | Sdc4            | 0.056201                       | AW495222                 |        |
| Edar                       | H2-m2                           | 0.62844                        |                                            |                                | Nfkbiz                    | 0.012757                       | St7             | 0.159857                       | Cd70                     |        |
| Emr1                       | Optn                            | 0.025011                       |                                            |                                |                           |                                |                 |                                | Ddx25                    |        |
| Fam129a                    | Ptgs2                           | 0.041435                       |                                            |                                |                           |                                |                 |                                | Efna2                    |        |
| Gbp4                       | Sema4a                          | 0.009532                       |                                            |                                |                           |                                |                 |                                | Eno2                     |        |
| Gm6537                     | Slc7a7                          | 0.319379                       |                                            |                                |                           |                                |                 |                                | Exoc3l4                  |        |
| Hsd11b2                    | Tnfsf4                          | 0.177463                       |                                            |                                |                           |                                |                 |                                | Fam124b                  |        |
| Ier3                       | Tnip1                           | 0.009388                       |                                            |                                |                           |                                |                 |                                | Fblim1                   |        |
| Il10rb                     | Tpbg                            | 0.062919                       |                                            |                                |                           |                                |                 |                                | Gm11978                  |        |
| Rab33a                     | Zhx2                            | 0.122343                       |                                            |                                |                           |                                |                 |                                | Gng4                     |        |
| Scin                       |                                 |                                |                                            |                                |                           |                                |                 |                                | Gypc                     |        |
| Spib                       |                                 |                                |                                            |                                |                           |                                |                 |                                | Itga2b                   |        |
| Spire1                     |                                 |                                |                                            |                                |                           |                                |                 |                                | Lipg                     |        |
| Stap2                      |                                 |                                |                                            |                                |                           |                                |                 |                                | Marco                    |        |
| Tbc1d1                     |                                 |                                |                                            |                                |                           |                                |                 |                                | Mcpt2                    |        |
| Tle2                       |                                 |                                |                                            |                                |                           |                                |                 |                                | Nlrc4                    |        |
| Tnfrsf14                   |                                 |                                |                                            |                                |                           |                                |                 |                                | Ptpn3                    |        |
| Vash1                      |                                 |                                |                                            |                                |                           |                                |                 |                                | Samd14                   |        |
| Zfp960                     |                                 |                                |                                            |                                |                           |                                |                 |                                | Smco3                    |        |
|                            |                                 |                                |                                            |                                |                           |                                |                 |                                | Sspo                     |        |
|                            |                                 |                                |                                            |                                |                           |                                |                 |                                | Tmem151b                 |        |





|        |
|--------|
| Xlr    |
| Zfp937 |

|              |
|--------------|
| Lbp          |
| Lbx2         |
| Loxl4        |
| Lrrc8e       |
| Lta          |
| Mapk8ip1     |
| Mfi2         |
| Myadm12      |
| Mybphl       |
| Myo5c        |
| Nkx1-2       |
| Nos2         |
| Noxa1        |
| Npb          |
| Nrgn         |
| Nt5c1a       |
| Oaf          |
| Ocln         |
| Olfrr175-ps1 |
| Pdzk1ip1     |
| Phlda2       |
| Ppfa2        |
| Prss2        |
| Ranbp17      |
| Rassf6       |
| Rbm44        |
| Rlbp1        |
| Rln1         |
| Rprm         |
| Rtkn         |
| Sapcd1       |
| Slc1a1       |
| Slc6a1       |
| Sox5os3      |
| Srd5a2       |
| Stox2        |
| Tex26        |
| Tfec         |
| Tmem119      |
| Tmod2        |
| Tnfrsf10b    |
| Trib2        |
| Trim58       |
| Vcam1        |
| Wnt9b        |
| Zfp572       |
| Zfp811       |



Supplementary Table 10. Control of gene expression in cDCs by cell-intrinsic and -extrinsic MyD88 signaling

| Gene Symbol (CD11c-MYD88 dep) | Fold Change (linear) (SPC 6h vs. WT-6h) | ANOVA p-value (SPC-6h vs. WT-6h) | Fold Change (linear) (CD11c-6h vs. WT-6h) | ANOVA p-value (CD11c-6h vs. WT-6h) | Fold Change (linear) (KO-6h vs. WT-6h) | ANOVA p-value (KO-6h vs. WT-6h) |
|-------------------------------|-----------------------------------------|----------------------------------|-------------------------------------------|------------------------------------|----------------------------------------|---------------------------------|
| Tnfsf9                        | -1.37                                   | 0.338717                         | -121.59                                   | 0.070077                           | -50.13                                 | 0.011913                        |
| Tnfr                          | -1.43                                   | 0.411276                         | -36.66                                    | 0.005067                           | -40.29                                 | 0.006556                        |
| Ili2b                         | 1.09                                    | 0.587694                         | -35.17                                    | 0.009287                           | -8.06                                  | 0.003549                        |
| Gm10462                       | -1.05                                   | 0.953278                         | -31.94                                    | 0.230912                           | -3.43                                  | 0.2738                          |
| Nfkbi2                        | -1.58                                   | 0.123099                         | -27.98                                    | 0.012757                           | -14.23                                 | 0.009179                        |
| Tnfaip3                       | -1.69                                   | 0.128444                         | -25.11                                    | 0.004562                           | -16.42                                 | 0.005051                        |
| Nfkbia                        | -1.29                                   | 0.012619                         | -18.93                                    | 0.010888                           | -10.93                                 | 0.000173                        |
| Cd40                          | -1.69                                   | 0.210216                         | -15.11                                    | 0.002432                           | -12.8                                  | 0.002901                        |
| Dusp2                         | -1.6                                    | 0.230608                         | -12.74                                    | 0.002973                           | -10.08                                 | 0.005281                        |
| Orm2                          | -1.86                                   | 0.21424                          | -12.38                                    | 0.001418                           | -6.66                                  | 0.00145                         |
| Mmp25                         | -1.51                                   | 0.170102                         | -9.58                                     | 0.008067                           | -4.05                                  | 0.01137                         |
| Anf5c                         | -1.04                                   | 0.191909                         | -9.45                                     | 0.096752                           | -6.73                                  | 0.037522                        |
| Tgfr1                         | -1.95                                   | 0.012248                         | -9.3                                      | 0.003535                           | -6.73                                  | 0.003026                        |
| Ptgs2                         | -1.03                                   | 0.895866                         | -9.28                                     | 0.012555                           | -7.17                                  | 0.039175                        |
| Lyt75                         | -1.67                                   | 0.100231                         | -9.05                                     | 0.026953                           | -9.05                                  | 0.004559                        |
| Pik3r5                        | -1.44                                   | 0.058751                         | -8.49                                     | 0.043887                           | -6.31                                  | 0.010373                        |
| Ptafr                         | 1.03                                    | 0.950332                         | -8.42                                     | 0.033099                           | -2.03                                  | 0.168514                        |
| Cd274                         | -1.74                                   | 0.276093                         | -8.04                                     | 0.089825                           | -16.04                                 | 0.030025                        |
| Bcl3                          | -1.49                                   | 0.060862                         | -8                                        | 0.016167                           | -3.21                                  | 0.003088                        |
| Ppp1r15a                      | -1.25                                   | 0.143701                         | -7.83                                     | 0.049767                           | -2.92                                  | 0.043507                        |
| Ili1rn                        | -1.41                                   | 0.441123                         | -7.76                                     | 0.001381                           | -11.96                                 | 0.015136                        |
| Ili2ra                        | 1.23                                    | 0.614564                         | -7.52                                     | 0.002127                           | -6.97                                  | 0.000448                        |
| Raggef2                       | 1.18                                    | 0.458                            | -7.47                                     | 0.003527                           | -3.65                                  | 0.026318                        |
| Swap70                        | 1.22                                    | 0.270471                         | -7.4                                      | 0.108981                           | -3.74                                  | 0.014074                        |
| Eid3                          | 1.42                                    | 0.528146                         | -7.39                                     | 0.121127                           | -2.31                                  | 0.33511                         |
| Lrrc32                        | -1.43                                   | 0.139761                         | -7.22                                     | 0.070775                           | -3.67                                  | 0.04323                         |
| Cflar                         | -1.38                                   | 0.215976                         | -7.07                                     | 0.002845                           | -6.17                                  | 0.005214                        |
| Birc3                         | -1.19                                   | 0.300611                         | -7.01                                     | 0.004921                           | -4.37                                  | 0.008908                        |
| Sema7a                        | -1.23                                   | 0.700636                         | -6.82                                     | 0.068193                           | -2.05                                  | 0.18186                         |
| Kif21b                        | 1.21                                    | 0.232408                         | -6.74                                     | 0.043882                           | -3.48                                  | 0.020164                        |
| Orm3                          | -1.6                                    | 0.080214                         | -6.63                                     | 0.017728                           | -9.03                                  | 0.002284                        |
| Traf1                         | 1.04                                    | 0.654551                         | -6.54                                     | 0.107335                           | -2.64                                  | 0.004356                        |
| Tmem39a                       | 1.05                                    | 0.760883                         | -6.46                                     | 0.01079                            | -7.71                                  | 0.014034                        |
| Nfkbid                        | -1.52                                   | 0.261178                         | -6.46                                     | 0.042764                           | -4.9                                   | 0.020825                        |
| Birc2                         | -1.15                                   | 0.558421                         | -6.29                                     | 0.019031                           | -4.1                                   | 0.035801                        |
| Plat                          | -1.82                                   | 0.367861                         | -6.27                                     | 0.057314                           | -4.92                                  | 0.073364                        |
| Slc41a1                       | -1.93                                   | 0.037108                         | -6.26                                     | 0.00427                            | -4.54                                  | 0.007697                        |
| Tank                          | -1.12                                   | 0.550613                         | -6.18                                     | 0.003724                           | -2.95                                  | 0.015387                        |
| Clec2d                        | -1.26                                   | 0.479065                         | -6.06                                     | 0.071442                           | -2.47                                  | 0.06352                         |
| Csrnp1                        | -1.67                                   | 0.239606                         | -6.06                                     | 0.088298                           | -2.3                                   | 0.024491                        |
| 170004717Rik2                 | -1.42                                   | 0.319554                         | -6.05                                     | 0.043958                           | -6.09                                  | 0.009943                        |
| Irga5                         | 1.04                                    | 0.887039                         | -5.8                                      | 0.073328                           | -2.36                                  | 0.041944                        |
| Zc3h12c                       | -1.37                                   | 0.256263                         | -5.74                                     | 0.004051                           | -4.55                                  | 0.013771                        |
| Ili10ra                       | -1.37                                   | 0.612721                         | -5.72                                     | 0.080947                           | -4.13                                  | 0.115409                        |
| Tnfaip2                       | -1.72                                   | 0.092233                         | -5.62                                     | 0.001469                           | -6.02                                  | 0.000487                        |
| Stat5a                        | -1.32                                   | 0.089571                         | -5.56                                     | 0.03603                            | -4.5                                   | 0.004562                        |
| Uchl4                         | -1.12                                   | 0.561424                         | -5.44                                     | 0.015203                           | -2.48                                  | 0.080939                        |
| Ccl22                         | -1.19                                   | 0.321505                         | -5.24                                     | 0.174339                           | -3.36                                  | 0.002952                        |
| Sdc4                          | -1.49                                   | 0.161008                         | -5.22                                     | 0.056201                           | -5.79                                  | 0.016332                        |
| Gm10197                       | -1.84                                   | 0.345472                         | -5.11                                     | 0.188977                           | -2.79                                  | 0.278618                        |
| Myo1g                         | -1.11                                   | 0.43639                          | -5.1                                      | 0.088165                           | -3.09                                  | 0.000421                        |
| Tspan33                       | -1.94                                   | 0.070051                         | -4.93                                     | 0.005612                           | -4.82                                  | 0.002188                        |
| Pvr                           | -1.85                                   | 0.063348                         | -4.9                                      | 0.000591                           | -2.95                                  | 3.04E-08                        |
| Pfkfb3                        | -1.96                                   | 0.004891                         | -4.9                                      | 0.109042                           | -2.63                                  | 0.002607                        |
| Tk1                           | -1.58                                   | 0.03972                          | -4.87                                     | 0.072172                           | -2.94                                  | 0.008103                        |
| Orm1                          | -1.41                                   | 0.203919                         | -4.84                                     | 0.001298                           | -5.78                                  | 0.00096                         |
| Nfkbi1                        | -1.77                                   | 0.010953                         | -4.82                                     | 0.028085                           | -4.9                                   | 0.000728                        |
| Fscn1                         | -1.3                                    | 0.016178                         | -4.82                                     | 0.261804                           | -3.01                                  | 0.027493                        |
| Sfn2                          | -1.53                                   | 0.348219                         | -4.79                                     | 0.027918                           | -3.16                                  | 0.027931                        |
| Txnr1d1                       | -1.4                                    | 0.108912                         | -4.79                                     | 0.026644                           | -2.76                                  | 0.02185                         |
| Ehd1                          | -1.48                                   | 0.100189                         | -4.77                                     | 0.019542                           | -3.14                                  | 0.006773                        |
| Sowahc                        | -1.13                                   | 0.824642                         | -4.7                                      | 0.001759                           | -4.23                                  | 0.090005                        |
| Poglut1                       | 1.41                                    | 0.187052                         | -4.7                                      | 0.04988                            | -3.53                                  | 0.022795                        |
| Rnf19b                        | -1.1                                    | 0.562647                         | -4.62                                     | 0.019309                           | -4.79                                  | 0.006342                        |
| Map3k8                        | -1.54                                   | 0.27055                          | -4.61                                     | 0.074423                           | -3.36                                  | 0.066248                        |
| Afmid                         | -1.99                                   | 0.059039                         | -4.51                                     | 0.088476                           | -3.48                                  | 0.006895                        |
| Casp4                         | -1.15                                   | 0.660997                         | -4.49                                     | 0.062415                           | -3.8                                   | 0.079408                        |
| Procr                         | -1.34                                   | 0.33016                          | -4.47                                     | 0.017349                           | -3.84                                  | 0.006676                        |
| Ccr7                          | -1.78                                   | 0.032485                         | -4.4                                      | 0.14106                            | -3.21                                  | 0.098743                        |
| Herpud1                       | 1.27                                    | 0.510081                         | -4.37                                     | 0.097353                           | -2.57                                  | 0.084992                        |

| Gene Symbol (EC-MYD88 dep) | Fold Change (linear) (SPC-6h vs. WT-6h) | ANOVA p-value (SPC-6h vs. WT-6h) | Fold Change (linear) (CD11c-6h vs. WT-6h) | ANOVA p-value (CD11c-6h vs. WT-6h) | Fold Change (linear) (KO-6h vs. WT-6h) | ANOVA p-value (KO-6h vs. WT-6h) |
|----------------------------|-----------------------------------------|----------------------------------|-------------------------------------------|------------------------------------|----------------------------------------|---------------------------------|
| Si100a8                    | -12.27                                  | 0.144594                         | -1.42                                     | 0.894939                           | -23.95                                 | 0.054409                        |
| Vdr                        | -4.79                                   | 0.019396                         | -1.88                                     | 0.08659                            | -2.85                                  | 0.135368                        |
| Rnf169                     | -3.46                                   | 0.088161                         | -1.59                                     | 0.516802                           | -3.64                                  | 0.073889                        |
| Fkbp5                      | -3.4                                    | 0.005372                         | -1.77                                     | 0.036819                           | -3.72                                  | 0.006858                        |
| Plet1                      | -3.27                                   | 0.013284                         | -1.09                                     | 0.63972                            | -4.62                                  | 0.008493                        |
| Lifr                       | -3.2                                    | 0.016174                         | 1.38                                      | 0.533181                           | -2.21                                  | 0.029484                        |
| Amica1                     | -3.08                                   | 0.098335                         | -1.96                                     | 0.153183                           | -3.68                                  | 0.055816                        |
| Mt2                        | -2.98                                   | 0.118165                         | -1.8                                      | 0.125033                           | -2.54                                  | 0.091858                        |
| Ap1s2                      | -2.93                                   | 0.002965                         | 1.19                                      | 0.623445                           | -2.33                                  | 0.007934                        |
| Pppap2a                    | -2.46                                   | 0.196149                         | -1.08                                     | 0.930773                           | -3.64                                  | 0.029661                        |
| Gm15250                    | -2.4                                    | 0.075904                         | -1.74                                     | 0.134552                           | -2.74                                  | 0.023943                        |
| Gda                        | -2.36                                   | 0.120692                         | -1.35                                     | 0.43064                            | -2.29                                  | 0.207234                        |
| Enah                       | -2.35                                   | 0.005795                         | -1.02                                     | 0.964515                           | -2.5                                   | 0.003034                        |
| Acvr2a                     | -2.3                                    | 0.071394                         | -1.11                                     | 0.829294                           | -2.44                                  | 0.092053                        |
| Si100a9                    | -2.28                                   | 0.451309                         | -1.49                                     | 0.701988                           | -4.99                                  | 0.206339                        |
| Glul                       | -2.28                                   | 0.094752                         | -1.4                                      | 0.348867                           | -2.06                                  | 0.081919                        |
| Tns1                       | -2.26                                   | 0.060063                         | -1.63                                     | 0.138554                           | -2.89                                  | 0.042981                        |
| Gpr141                     | -2.25                                   | 0.01897                          | -1.34                                     | 0.090127                           | -2.14                                  | 0.116632                        |
| Hist2h2aa1                 | -2.19                                   | 0.33546                          | -1.2                                      | 0.842145                           | -2                                     | 0.380619                        |
| Kmo                        | -2.18                                   | 0.181872                         | -1.8                                      | 0.208579                           | -3.11                                  | 0.126679                        |
| Tsc22d3                    | -2.14                                   | 0.024438                         | -1.97                                     | 0.037144                           | -2.33                                  | 0.040248                        |
| Bcar3                      | -2.07                                   | 0.126715                         | -1.95                                     | 0.028399                           | -3                                     | 0.007825                        |
| St7                        | -2.05                                   | 0.003135                         | -1.82                                     | 0.159857                           | -4                                     | 0.002427                        |
| Pfkb                       | -2.05                                   | 0.052389                         | -1.74                                     | 0.131646                           | -2.1                                   | 0.058564                        |
| Gm10800                    | -2.05                                   | 0.085435                         | 1.17                                      | 0.787973                           | -2.32                                  | 0.199616                        |
| Ii7r                       | -2.04                                   | 0.126853                         | -1.2                                      | 0.728577                           | -2.2                                   | 0.223597                        |
| Stk39                      | -2.03                                   | 0.226896                         | -1.98                                     | 0.101046                           | -2.36                                  | 0.036083                        |
| Clec2f                     | -2.02                                   | 0.082392                         | -1.79                                     | 0.11266                            | -2.13                                  | 0.123341                        |
| Klri2                      | 2                                       | 0.093163                         | 1.75                                      | 0.267655                           | 2.44                                   | 0.058892                        |
| Nucb2                      | 2                                       | 0.12523                          | 1.76                                      | 0.006415                           | 3.16                                   | 0.027355                        |
| Hexa                       | 2.02                                    | 0.02216                          | -1.27                                     | 0.726247                           | 2.63                                   | 0.020292                        |
| Plcb2                      | 2.05                                    | 0.043005                         | 1.37                                      | 0.460786                           | 2.86                                   | 0.006549                        |
| Cxx1b                      | 2.13                                    | 0.146912                         | 1.81                                      | 0.57297                            | 2.97                                   | 0.124759                        |
| Pilrb1                     | 2.14                                    | 0.045441                         | 1.51                                      | 0.413764                           | 3.01                                   | 0.034387                        |
| Emr4                       | 2.2                                     | 0.178944                         | -1.31                                     | 0.150212                           | 2.38                                   | 0.036056                        |
| Klri1                      | 2.2                                     | 0.144267                         | 1.79                                      | 0.267904                           | 3.56                                   | 0.068929                        |
| Hpgds                      | 2.21                                    | 0.13636                          | 1.45                                      | 0.211565                           | 3.59                                   | 0.01792                         |
| Anapc13                    | 2.21                                    | 0.0776                           | 1.86                                      | 0.3083                             | 3.49                                   | 0.016559                        |
| Myo1f                      | 2.24                                    | 0.002737                         | -1.11                                     | 0.909299                           | 3.22                                   | 0.000864                        |
| Ddit3                      | 2.24                                    | 0.007279                         | 1.31                                      | 0.389306                           | 2.48                                   | 0.074195                        |
| Card11                     | 2.27                                    | 0.014247                         | 1.04                                      | 0.962019                           | 2.76                                   | 0.004117                        |
| Gm14274                    | 2.28                                    | 0.001223                         | 1.23                                      | 0.417879                           | 2.13                                   | 0.031427                        |
| Gbp8                       | 2.33                                    | 0.010032                         | -1.11                                     | 0.625122                           | 2.62                                   | 0.057464                        |
| Ctsc                       | 2.34                                    | 0.021735                         | 1.86                                      | 0.080842                           | 3.46                                   | 0.016164                        |
| Nlrp1c-ps                  | 2.35                                    | 0.09946                          | -1.01                                     | 0.980693                           | 2.27                                   | 0.162255                        |
| Arsb                       | 2.36                                    | 0.174733                         | 1.49                                      | 0.452782                           | 3.03                                   | 0.108669                        |
| Pgapi1                     | 2.43                                    | 0.026876                         | 1.45                                      | 0.508756                           | 2.09                                   | 0.131286                        |
| Ccnd1                      | 2.47                                    | 0.001567                         | 1.22                                      | 0.429878                           | 4.07                                   | 0.014298                        |
| Abcg3                      | 2.49                                    | 0.000246                         | 1.24                                      | 0.48                               | 3.42                                   | 0.000389                        |
| F2r12                      | 2.49                                    | 0.046562                         | 1.65                                      | 0.028696                           | 2.47                                   | 0.010013                        |
| Igals1                     | 2.5                                     | 0.080914                         | -1.03                                     | 0.880055                           | 2.33                                   | 0.118759                        |
| Tnfsf13b                   | 2.53                                    | 0.040712                         | 1.67                                      | 0.343904                           | 2.66                                   | 0.043214                        |
| Smim15                     | 2.56                                    | 0.20632                          | 1.84                                      | 0.289155                           | 2.49                                   | 0.126415                        |
| Gm13772                    | 2.59                                    | 0.077993                         | 1.33                                      | 0.625202                           | 2.06                                   | 0.138187                        |
| Cd44                       | 2.63                                    | 0.009851                         | 1.19                                      | 0.699789                           | 4.19                                   | 0.007267                        |
| H2-M2                      | 2.68                                    | 0.08985                          | -1.3                                      | 0.437257                           | 2.7                                    | 0.087552                        |
| Bst2                       | 2.91                                    | 0.157318                         | -1.84                                     | 0.598001                           | 5.97                                   | 0.018271                        |
| Pilra                      | 3.11                                    | 0.061444                         | 1.71                                      | 0.307113                           | 2.35                                   | 0.104983                        |
| Pdlim1                     | 3.49                                    | 0.014926                         | 1.7                                       | 0.029581                           | 5.05                                   | 0.012516                        |
| Hspa1b                     | 4.13                                    | 0.120222                         | 1.65                                      | 0.629732                           | 2.26                                   | 0.372598                        |
| Hsph1                      | 4.48                                    | 0.027696                         | 1.3                                       | 0.804563                           | 2.58                                   | 0.065623                        |
| Gm20481                    | 4.65                                    | 0.200778                         | -1.28                                     | 0.884221                           | 3.04                                   | 0.52542                         |
| Gm15428                    | 5.3                                     | 0.283414                         | -1.06                                     | 0.883248                           | 2.11                                   | 0.184829                        |
| Hspa1a                     | 5.31                                    | 0.051175                         | 1.25                                      | 0.854198                           | 2.84                                   | 0.461267                        |

|               |       |          |       |          |       |          |
|---------------|-------|----------|-------|----------|-------|----------|
| Clec4a1       | 1.62  | 0.007827 | -4.34 | 0.153479 | -2.19 | 0.044963 |
| 3110043O21Rik | -1.2  | 0.313208 | -4.29 | 0.015067 | -3.22 | 0.011674 |
| Ilib          | -1.3  | 0.19188  | -4.26 | 0.006276 | -4.43 | 0.044471 |
| Etv3          | -1.01 | 0.937106 | -4.23 | 0.06884  | -2.25 | 0.040407 |
| Tlr13         | 1.13  | 0.886176 | -4.21 | 0.019211 | -3.15 | 0.011862 |
| Nfkab2        | 1.01  | 0.931852 | -4.21 | 0.05568  | -2.81 | 0.001444 |
| Bcl2l1        | -1.44 | 0.436838 | -4.16 | 0.101566 | -2.48 | 0.005872 |
| Mllt6         | -1.47 | 0.224135 | -4.1  | 0.032772 | -4.43 | 0.004594 |
| Cicf1         | -1.95 | 0.020693 | -4.07 | 0.018989 | -3.87 | 0.006762 |
| Rab21         | -1.49 | 0.305213 | -3.98 | 0.038908 | -3.09 | 0.058014 |
| Bhlhe40       | -1.17 | 0.435442 | -3.98 | 0.141267 | -2.1  | 0.021912 |
| Sema4a        | -1.13 | 0.085358 | -3.97 | 0.109354 | -2.52 | 0.00531  |
| Slc2a6        | 1.37  | 0.240711 | -3.97 | 0.085795 | -2.34 | 0.025095 |
| Irak2         | -1.71 | 0.149913 | -3.97 | 0.090889 | -2.3  | 0.078751 |
| Ehf           | 1.24  | 0.634354 | -3.96 | 0.047722 | -4.08 | 0.078401 |
| Tbc1d4        | 1.05  | 0.72393  | -3.88 | 0.027651 | -3.09 | 0.0073   |
| Tspan3        | -1.23 | 0.520859 | -3.88 | 0.007489 | -2.37 | 0.006426 |
| Crtc2         | -1.6  | 0.145825 | -3.83 | 0.018408 | -3.53 | 0.00119  |
| Gm614         | -1.59 | 0.024354 | -3.78 | 0.075601 | -2.74 | 0.007091 |
| Ccr12         | -1.26 | 0.325342 | -3.74 | 0.049408 | -2.67 | 0.153424 |
| Rab8b         | -1.44 | 0.010047 | -3.71 | 0.077022 | -2.09 | 0.031139 |
| Nup62-il41    | 1.07  | 0.825022 | -3.69 | 0.064785 | -3.48 | 0.037234 |
| Nrp2          | -1.25 | 0.533116 | -3.66 | 0.013419 | -4.73 | 0.002236 |
| Cacfd1        | 1.39  | 0.282125 | -3.59 | 0.002407 | -3.04 | 0.017777 |
| Zbtb18        | -1.16 | 0.62877  | -3.59 | 0.040897 | -2.21 | 0.081992 |
| Traf6         | -1.48 | 0.07614  | -3.54 | 0.013578 | -3.97 | 0.015032 |
| Aebp2         | -1.52 | 0.053059 | -3.54 | 0.033717 | -3.82 | 0.005702 |
| Tmem63b       | 1.27  | 0.162016 | -3.54 | 0.010143 | -2.63 | 0.030224 |
| Tmem19        | -1.47 | 0.436409 | -3.51 | 0.098763 | -2.79 | 0.039183 |
| Cx3cl1        | -1.78 | 0.025217 | -3.5  | 0.005365 | -2.65 | 0.022681 |
| Adora2a       | -1.11 | 0.714937 | -3.47 | 0.058721 | -3    | 0.028417 |
| Mmp14         | -1.78 | 0.11591  | -3.46 | 0.006981 | -3.97 | 0.018483 |
| Aldh1a2       | -1.66 | 0.328105 | -3.44 | 0.237952 | -5.29 | 0.011629 |
| Bcl2a1c       | -1.81 | 0.144633 | -3.42 | 0.008064 | -5.03 | 0.007255 |
| Car13         | 1.68  | 0.337471 | -3.4  | 0.11612  | -4.54 | 0.056321 |
| Ilg           | -1.09 | 0.871534 | -3.38 | 0.079342 | -3.02 | 0.017246 |
| Nfkbb         | -1.06 | 0.843313 | -3.37 | 0.057766 | -2.57 | 0.019385 |
| Srp54c        | -1.23 | 0.078371 | -3.37 | 0.010979 | -2.23 | 0.003039 |
| Tle3          | -1.39 | 0.346752 | -3.37 | 0.041387 | -2.12 | 0.011635 |
| Jak2          | -1.56 | 0.110713 | -3.36 | 0.002273 | -3.34 | 0.004445 |
| Gm9320        | -1.48 | 0.062869 | -3.36 | 0.005783 | -2.32 | 0.060527 |
| Mki67         | -1.26 | 0.437477 | -3.33 | 0.035802 | -3.61 | 0.024619 |
| Mab21l3       | -1.21 | 0.347413 | -3.32 | 0.045363 | -3.95 | 0.006256 |
| Tnip1         | 1.21  | 0.028809 | -3.32 | 0.000954 | -3.02 | 0.006373 |
| Gem           | -1.99 | 0.209297 | -3.31 | 0.025731 | -4.8  | 0.040364 |
| Gm20689       | -1.6  | 0.066889 | -3.31 | 0.056542 | -2.33 | 0.038839 |
| Myd88         | -1.5  | 0.278233 | -3.3  | 0.00746  | -3.1  | 0.003199 |
| Dennd4b       | -1.38 | 0.196745 | -3.27 | 0.164872 | -2.1  | 0.028587 |
| Mreg          | 1.08  | 0.728661 | -3.23 | 0.025466 | -3.34 | 0.034323 |
| Apaf1         | -1.54 | 0.056277 | -3.21 | 0.024936 | -2.91 | 0.01574  |
| 4932438H23Rik | -1.74 | 0.007309 | -3.19 | 0.12022  | -4.45 | 0.023671 |
| Zfp703        | -1.44 | 0.129199 | -3.18 | 0.233111 | -2.48 | 0.063595 |
| Apobec3       | -1.89 | 0.039826 | -3.16 | 0.00648  | -3.54 | 0.005308 |
| Sema4c        | -1.9  | 0.029429 | -3.16 | 0.008856 | -2.61 | 0.022933 |
| Ncf1          | -1.1  | 0.688112 | -3.1  | 0.153276 | -2.18 | 0.043764 |
| Cxcr4         | -1.81 | 0.096682 | -3.09 | 0.267997 | -2.6  | 0.040439 |
| Zfp361        | -1.34 | 0.270102 | -3.08 | 0.133891 | -2.68 | 0.033073 |
| 1700034J05Rik | 1.28  | 0.235299 | -3.07 | 0.013059 | -2.26 | 0.07213  |
| Rap2a         | -1.61 | 0.238634 | -3.05 | 0.065537 | -3.5  | 0.053621 |
| Htr7          | -1.8  | 0.228808 | -2.98 | 0.107787 | -4.25 | 0.032364 |
| Spred1        | -1.32 | 0.476775 | -2.98 | 0.026416 | -3.16 | 0.052984 |
| Slc9a3r1      | 1.03  | 0.856616 | -2.94 | 0.058624 | -2.34 | 0.036226 |
| Osgin2        | 1.04  | 0.874938 | -2.94 | 0.025874 | -2.08 | 0.116116 |
| Cpeb4         | -1.22 | 0.412288 | -2.93 | 0.030109 | -2.73 | 0.008934 |
| Prdm1         | -1.5  | 0.529514 | -2.92 | 0.097405 | -5.22 | 0.043852 |
| Lamtor3       | -1.98 | 0.038598 | -2.92 | 0.053323 | -2.34 | 0.008835 |
| Slc24a1       | -1.52 | 0.038242 | -2.9  | 0.041434 | -3.4  | 0.017945 |
| Tmem120b      | -1.56 | 0.461036 | -2.86 | 0.108325 | -2.45 | 0.12316  |
| Clec2j        | -1.44 | 0.283195 | -2.86 | 0.004514 | -2.32 | 0.050442 |
| 4932442E05Rik | 1.48  | 0.226809 | -2.86 | 0.079413 | -2.04 | 0.057709 |
| Sdhaf1        | -1.73 | 0.208362 | -2.84 | 0.065086 | -2.71 | 0.044587 |
| Rel           | -1.39 | 0.00362  | -2.84 | 0.002078 | -2.36 | 0.00117  |
| Snd1          | -1.6  | 0.072982 | -2.83 | 0.138141 | -2.69 | 0.040901 |
| Ggta1         | -1.23 | 0.141605 | -2.82 | 0.193385 | -4.52 | 0.001486 |
| Malt1         | -1.49 | 0.087032 | -2.82 | 0.004404 | -3.01 | 0.020178 |

|               |       |          |       |          |       |          |
|---------------|-------|----------|-------|----------|-------|----------|
| Slc30a4       | -1.7  | 0.294514 | -2.82 | 0.13418  | -2.44 | 0.147586 |
| Gm15953       | 1.09  | 0.822934 | -2.81 | 0.0012   | -2.24 | 0.015786 |
| Rras2         | -1.34 | 0.2569   | -2.8  | 0.021541 | -3.55 | 0.119767 |
| Rab12         | -1    | 0.994061 | -2.8  | 0.055346 | -2.29 | 0.110199 |
| Z610024D14Rik | -1.8  | 0.219594 | -2.79 | 0.072255 | -2.06 | 0.076878 |
| Mxd1          | -1.08 | 0.515864 | -2.76 | 0.096936 | -2.42 | 0.008768 |
| Sbds          | -1.9  | 0.069259 | -2.76 | 0.045058 | -2.05 | 0.069643 |
| Foxp4         | -1.05 | 0.543509 | -2.75 | 0.003958 | -3.18 | 0.010813 |
| Ccnd2         | -1.99 | 0.088219 | -2.73 | 0.001851 | -4.43 | 0.003917 |
| Tspo          | 1.28  | 0.743259 | -2.73 | 0.30167  | 2.41  | 0.343832 |
| Gnai3         | -1.27 | 0.000657 | -2.72 | 0.104385 | -2.03 | 0.035555 |
| Irga4         | -1.34 | 0.354288 | -2.68 | 0.002039 | -2.79 | 0.006884 |
| Flnb          | -1.16 | 0.216247 | -2.66 | 0.066819 | -2.13 | 0.000312 |
| Ndrp1         | -1.46 | 0.309567 | -2.63 | 0.04784  | -4.31 | 0.020215 |
| E130208F15Rik | -1.8  | 0.079458 | -2.6  | 0.081641 | -2.77 | 0.030035 |
| Pus10         | -1.21 | 0.125942 | -2.59 | 0.12639  | -3.03 | 0.005222 |
| Tarm1         | -1.46 | 0.332511 | -2.58 | 0.152738 | -3.91 | 0.011307 |
| St8sia4       | -1.07 | 0.69868  | -2.58 | 0.041638 | -2.25 | 0.039365 |
| Denn4a        | -1.41 | 0.007072 | -2.57 | 0.00503  | -2.06 | 0.009343 |
| Gpr55         | -1.65 | 0.173368 | -2.56 | 0.034136 | -3.09 | 0.01145  |
| Lrrk1         | -1.48 | 0.080737 | -2.56 | 0.070545 | -2.22 | 0.009779 |
| Skil          | -1.42 | 0.017101 | -2.55 | 0.002264 | -2.11 | 0.002826 |
| Galt7         | -1.8  | 0.127317 | -2.53 | 0.009547 | -2.57 | 0.026874 |
| Fabp5         | 1.29  | 0.301466 | -2.51 | 0.070207 | -5.16 | 0.014445 |
| Otulin        | -1.34 | 0.199147 | -2.5  | 0.177039 | -2.01 | 0.078134 |
| Etv6          | -1.02 | 0.733932 | -2.48 | 0.00365  | -2.12 | 0.009344 |
| Slc22a15      | -1.92 | 0.103323 | -2.47 | 0.016523 | -2.63 | 0.01931  |
| Tmem131       | -1.3  | 0.383255 | -2.47 | 0.147385 | -2.48 | 0.005778 |
| Trim35        | -1.22 | 0.091419 | -2.47 | 0.234327 | -2.47 | 0.008183 |
| Casc3         | -1.06 | 0.77239  | -2.46 | 0.153887 | -2.03 | 0.052108 |
| Slc11a2       | -1.56 | 0.12756  | -2.42 | 0.071131 | -2.22 | 0.041097 |
| Clec2g        | -1.4  | 0.154611 | -2.41 | 0.003314 | -2.16 | 0.055897 |
| Med10         | -1.07 | 0.844899 | -2.4  | 0.032068 | -3.44 | 0.203557 |
| Zfc3h1        | -1.28 | 0.00183  | -2.4  | 0.003372 | -3.41 | 0.010417 |
| Stat5b        | -1.13 | 0.393427 | -2.4  | 0.07458  | -2.36 | 0.008851 |
| Stard7        | -1.28 | 0.225127 | -2.39 | 0.079283 | -2.36 | 0.061448 |
| Stx6          | -1.12 | 0.68314  | -2.39 | 0.078409 | -2.28 | 0.042177 |
| Ncoa7         | -1.64 | 0.032859 | -2.38 | 0.012466 | -2.89 | 0.009267 |
| Kcnk6         | -1.34 | 0.019648 | -2.38 | 0.009938 | -2.65 | 0.003528 |
| Pdlim7        | -1.1  | 0.489306 | -2.38 | 0.01747  | -2.05 | 0.051679 |
| Ms4a4a        | -1.91 | 0.05383  | -2.36 | 0.179286 | -3.43 | 0.012455 |
| Stx19         | -1.48 | 0.264375 | -2.34 | 0.036915 | -2.19 | 0.069147 |
| Cacnb3        | 1.29  | 0.191048 | -2.34 | 0.37036  | -2.09 | 0.070579 |
| Ktn1          | -1.34 | 0.459703 | -2.31 | 0.009222 | -3.3  | 0.00123  |
| Actn1         | -1.07 | 0.548571 | -2.29 | 0.098653 | -2.24 | 0.00421  |
| Timp1         | -1.47 | 0.219581 | -2.28 | 0.052217 | -2.42 | 0.209583 |
| Ccl9          | -1.56 | 0.002277 | -2.28 | 0.088202 | -2.33 | 0.224681 |
| Rcl1          | -1.36 | 0.35252  | -2.27 | 0.027262 | -2.63 | 0.002773 |
| Abtb2         | -1.65 | 0.145069 | -2.27 | 0.014541 | -2.36 | 0.002795 |
| Synj1         | -1.52 | 0.057894 | -2.27 | 0.016063 | -2.35 | 0.009551 |
| Gpr52         | 1.08  | 0.521895 | -2.27 | 0.079446 | -2.27 | 0.078947 |
| Large         | -1.63 | 0.155299 | -2.26 | 0.0003   | -4.56 | 0.000304 |
| Gpr126        | 1.09  | 0.883325 | -2.22 | 0.265049 | -2.55 | 0.17682  |
| Dph5          | -1.15 | 0.708492 | -2.2  | 0.037553 | -2.7  | 0.003776 |
| Cblb          | -1.31 | 0.260172 | -2.2  | 0.038204 | -2.09 | 0.027167 |
| Rgs1          | -1.77 | 0.143424 | -2.19 | 0.074352 | -3.58 | 0.098304 |
| Adam23        | -1.42 | 0.241832 | -2.18 | 0.014301 | -3.5  | 0.011552 |
| Rhoc          | -1.48 | 0.160066 | -2.17 | 0.024133 | -2.29 | 0.098234 |
| Tagap         | 1.08  | 0.796212 | -2.16 | 0.259518 | -2.27 | 0.112062 |
| Stxbp3b       | -1.86 | 0.175575 | -2.14 | 0.07409  | -2.04 | 0.070228 |
| Ext1          | -1.75 | 0.183123 | -2.13 | 0.043877 | -2.43 | 0.045791 |
| Tet2          | -1.67 | 0.132462 | -2.12 | 0.065349 | -2.54 | 0.07321  |
| Tbc1d17       | -1.03 | 0.891847 | -2.12 | 0.03188  | -2.21 | 0.009981 |
| Pla1a         | -1.49 | 0.280974 | -2.1  | 0.035857 | -3.2  | 0.015692 |
| Pikna1        | -1.94 | 0.102049 | -2.1  | 0.02743  | -2.15 | 0.020903 |
| Samsn1        | -1.24 | 0.526048 | -2.09 | 0.009963 | -2.19 | 0.003493 |
| Nfat5         | -1.36 | 0.154197 | -2.09 | 0.018994 | -2.01 | 0.018848 |
| Dnajc10       | -1.61 | 0.045071 | -2.08 | 0.015578 | -2.77 | 0.059053 |
| Mpp5          | -1.24 | 0.269634 | -2.08 | 0.023544 | -2.29 | 0.007562 |
| Pde1b         | -1.54 | 0.01748  | -2.07 | 0.169938 | -2.45 | 0.009921 |
| Pdcd1lg2      | -1.69 | 0.450188 | -2.04 | 0.271269 | -4.57 | 0.097529 |
| Gm16147       | -1.72 | 0.028979 | -2.04 | 0.036294 | -2.6  | 0.026365 |
| Fas           | -1.25 | 0.500999 | -2.03 | 0.011033 | -7.65 | 0.004485 |
| Marcks        | -1.26 | 0.067674 | -2.03 | 0.015036 | -2.11 | 0.047331 |
| Hamp2         | -1.64 | 0.263669 | -2.01 | 0.056292 | -2.05 | 0.001093 |

|               |       |          |      |          |       |          |
|---------------|-------|----------|------|----------|-------|----------|
| Iscu          | -1.28 | 0.615635 | -2   | 0.03611  | -3.12 | 0.006883 |
| Ikzf4         | -1.53 | 0.006507 | -2   | 0.002659 | -2.39 | 0.009089 |
| Zc3h12a       | -1.01 | 0.796173 | -2   | 0.014607 | -2.04 | 0.039299 |
| Sycp2         | -1.44 | 0.175309 | 2    | 0.278179 | 2.57  | 0.191571 |
| Cx3cr1        | 1.36  | 0.383245 | 2    | 0.245252 | 3.67  | 0.020306 |
| Klf4          | 1.26  | 0.465684 | 2.01 | 0.265342 | 3.9   | 0.039225 |
| Mef2c         | 1.34  | 0.07415  | 2.02 | 0.02843  | 2.43  | 0.012475 |
| Gfod1         | 1.87  | 0.028467 | 2.02 | 0.019758 | 2.57  | 0.088447 |
| Dhrs9         | 1.36  | 0.389582 | 2.1  | 0.089414 | 2.84  | 0.040289 |
| Med7          | 1.5   | 0.016722 | 2.11 | 0.054564 | 2.13  | 0.036974 |
| Arl11         | 1.12  | 0.842092 | 2.12 | 0.377808 | 2.17  | 0.005693 |
| Il1rl1        | -1.23 | 0.541406 | 2.12 | 0.047355 | 2.44  | 0.270442 |
| Emp1          | 1.03  | 0.80338  | 2.16 | 0.012535 | 3.38  | 0.038449 |
| Plgf          | 1.13  | 0.686386 | 2.23 | 0.220686 | 2.18  | 0.094369 |
| Tm6sf1        | -1.15 | 0.602218 | 2.27 | 0.036823 | 2.7   | 0.081507 |
| Hdgfrp3       | 1.24  | 0.207412 | 2.35 | 0.086406 | 2.5   | 0.008417 |
| Arrdc3        | 1.65  | 0.185997 | 2.38 | 0.091185 | 2.12  | 0.098666 |
| Rnase6        | 1.57  | 0.101951 | 2.38 | 0.076038 | 2.54  | 0.006488 |
| Tiparp        | -1.32 | 0.443198 | 2.39 | 0.012473 | 4.27  | 0.020412 |
| Cd84          | 1.59  | 0.503396 | 2.41 | 0.121272 | 2.3   | 0.164235 |
| Lst1          | 1.76  | 0.53054  | 2.41 | 0.016147 | 5.12  | 0.03509  |
| Dpep2         | 1.13  | 0.26156  | 2.46 | 0.018717 | 2.31  | 0.041074 |
| D130062J21Rik | 1.26  | 0.729859 | 2.46 | 0.0708   | 2.75  | 0.213829 |
| Hepacam2      | 1.24  | 0.195519 | 2.48 | 0.015766 | 2.63  | 0.022667 |
| Klrd1         | 1.28  | 0.22382  | 2.58 | 0.154897 | 2.82  | 0.03888  |
| Hcst          | 1.71  | 0.131739 | 2.9  | 0.134892 | 2.43  | 0.011948 |
| Al467606      | -1.29 | 0.416194 | 3.16 | 0.309792 | 2.13  | 0.343779 |
| Fam71a        | 1.96  | 0.098672 | 3.32 | 0.095472 | 3.18  | 0.024282 |
| Gm4199        | 1.43  | 0.524246 | 3.34 | 0.0254   | 2.03  | 0.276348 |
| Cd200r1       | 1.6   | 0.011408 | 3.45 | 0.114452 | 2.25  | 0.039032 |
| Dcstamp       | 1.31  | 0.25373  | 3.87 | 0.071401 | 5.48  | 0.091184 |
| Gm10337       | 1.69  | 0.176968 | 4.59 | 0.024781 | 3.31  | 0.246686 |
